# Supplementary material for: Y-box protein 1 is required to sort microRNAs into exosomes in cells and in a cell-free reaction
Source: eLife. 2016 Aug 25;5:e19276. doi: 10.7554/eLife.19276 (PMC5047747; doi:10.7554/eLife.19276)
Supplement: Figure 2—source data 2. — Number of reads mapped to each miRNA annotated in miRBase version 21 using the quantifier program of the miRdeep2 package. Reads per million miRNA mapped reads (RPM) were calculated and the quotient was taken to determine enrichment in exosomes. DOI: http://dx.doi.org/10.7554/eLife.19276.007 [file elife-19276-fig2-data2.xlsx]

## Sheet: Sheet1
miRNA	cell read_count	exo read_count	cell RPM	exo RPM	enrichment in exosomes
hsa-miR-451a	2	370	2.36567	2942.46	1243.82
hsa-miR-328-5p	4	412	4.73133	3276.47	692.505
hsa-miR-3125	1	51	1.18283	405.583	342.891
hsa-miR-144-3p	1	50	1.18283	397.63	336.168
hsa-miR-4429	1	27	1.18283	214.72	181.531
hsa-miR-4482-5p	1	25	1.18283	198.815	168.084
hsa-miR-6869-5p	17	419	20.1082	3332.14	165.711
hsa-miR-150-5p	2	47	2.36567	373.772	157.999
hsa-miR-6746-5p	1	18	1.18283	143.147	121.02
hsa-miR-6502-5p	2	35	2.36567	278.341	117.659
hsa-miR-142-3p	4	69	4.73133	548.73	115.978
hsa-miR-5587-3p	2	34	2.36567	270.388	114.297
hsa-miR-598-5p	1	17	1.18283	135.194	114.297
hsa-miR-6773-5p	1	17	1.18283	135.194	114.297
hsa-miR-1266-5p	2	30	2.36567	238.578	100.85
hsa-miR-3202	1	15	1.18283	119.289	100.85
hsa-miR-3202	1	15	1.18283	119.289	100.85
hsa-miR-6828-5p	1	15	1.18283	119.289	100.85
hsa-miR-1293	16	236	18.9253	1876.81	99.1695
hsa-miR-214-3p	1	13	1.18283	103.384	87.4036
hsa-miR-3135b	1	13	1.18283	103.384	87.4036
hsa-miR-4472	2	26	2.36567	206.768	87.4036
hsa-miR-4472	2	25	2.36567	198.815	84.0419
hsa-miR-203a	16	199	18.9253	1582.57	83.6217
hsa-miR-4505	1	12	1.18283	95.4312	80.6802
hsa-miR-520a-3p	1	12	1.18283	95.4312	80.6802
hsa-miR-6507-5p	1	12	1.18283	95.4312	80.6802
hsa-miR-4652-5p	5	60	5.91416	477.156	80.6802
hsa-miR-122-5p	40	478	47.3133	3801.34	80.3441
hsa-miR-4466	1	11	1.18283	87.4786	73.9569
hsa-miR-142-5p	4	41	4.73133	326.057	68.9144
hsa-miR-143-3p	27	270	31.9365	2147.2	67.2335
hsa-miR-4271	2	20	2.36567	159.052	67.2335
hsa-miR-433-3p	1	10	1.18283	79.526	67.2335
hsa-miR-3130-3p	2	19	2.36567	151.099	63.8719
hsa-miR-3130-3p	2	19	2.36567	151.099	63.8719
hsa-miR-197-5p	1	9	1.18283	71.5734	60.5102
hsa-miR-3919	1	9	1.18283	71.5734	60.5102
hsa-miR-6131	6	54	7.097	429.441	60.5102
hsa-miR-6726-5p	1	9	1.18283	71.5734	60.5102
hsa-miR-335-5p	1	8	1.18283	63.6208	53.7868
hsa-miR-3940-5p	1	8	1.18283	63.6208	53.7868
hsa-miR-4770	1	8	1.18283	63.6208	53.7868
hsa-miR-6728-5p	1	8	1.18283	63.6208	53.7868
hsa-miR-7107-5p	1	8	1.18283	63.6208	53.7868
hsa-miR-7110-5p	1	8	1.18283	63.6208	53.7868
hsa-miR-7111-5p	1	8	1.18283	63.6208	53.7868
hsa-let-7b-5p	120	938	141.94	7459.54	52.5542
hsa-miR-664a-5p	4	31	4.73133	246.531	52.106
hsa-miR-6772-5p	2	15	2.36567	119.289	50.4251
hsa-miR-382-5p	1	7	1.18283	55.6682	47.0635
hsa-miR-4462	1	7	1.18283	55.6682	47.0635
hsa-miR-5010-5p	1	7	1.18283	55.6682	47.0635
hsa-miR-6760-5p	1	7	1.18283	55.6682	47.0635
hsa-miR-6891-5p	1	7	1.18283	55.6682	47.0635
hsa-miR-3175	4	27	4.73133	214.72	45.3826
hsa-miR-1207-5p	2	13	2.36567	103.384	43.7018
hsa-miR-411-5p	3	18	3.5485	143.147	40.3401
hsa-miR-3192-5p	1	6	1.18283	47.7156	40.3401
hsa-miR-4784	1	6	1.18283	47.7156	40.3401
hsa-miR-6818-5p	4	24	4.73133	190.862	40.3401
hsa-miR-2115-3p	6	35	7.097	278.341	39.2196
hsa-miR-3168	2913	16023	3445.59	127425	36.9819
hsa-miR-4502	4	22	4.73133	174.957	36.9784
hsa-miR-548n	2	11	2.36567	87.4786	36.9784
hsa-miR-6775-5p	2	11	2.36567	87.4786	36.9784
hsa-miR-3934-5p	4	21	4.73133	167.005	35.2976
hsa-miR-4459	4	21	4.73133	167.005	35.2976
hsa-miR-144-5p	2	10	2.36567	79.526	33.6168
hsa-miR-3165	1	5	1.18283	39.763	33.6168
hsa-miR-3916	3	15	3.5485	119.289	33.6168
hsa-miR-4280	1	5	1.18283	39.763	33.6168
hsa-miR-4487	1	5	1.18283	39.763	33.6168
hsa-miR-4740-3p	1	5	1.18283	39.763	33.6168
hsa-miR-6514-5p	2	10	2.36567	79.526	33.6168
hsa-miR-6761-5p	1	5	1.18283	39.763	33.6168
hsa-miR-6821-5p	1	5	1.18283	39.763	33.6168
hsa-miR-6825-5p	1	5	1.18283	39.763	33.6168
hsa-miR-6831-5p	1	5	1.18283	39.763	33.6168
hsa-miR-6833-5p	2	10	2.36567	79.526	33.6168
hsa-miR-7845-5p	1	5	1.18283	39.763	33.6168
hsa-miR-3976	24	115	28.388	914.549	32.2161
hsa-miR-4268	2	9	2.36567	71.5734	30.2551
hsa-miR-432-5p	2	9	2.36567	71.5734	30.2551
hsa-miR-4535	2	9	2.36567	71.5734	30.2551
hsa-miR-4644	2	9	2.36567	71.5734	30.2551
hsa-miR-6734-5p	4	18	4.73133	143.147	30.2551
hsa-miR-6756-5p	2	9	2.36567	71.5734	30.2551
hsa-miR-6848-3p	2	9	2.36567	71.5734	30.2551
hsa-miR-4321	4	17	4.73133	135.194	28.5742
hsa-miR-365a-5p	14	56	16.5597	445.346	26.8934
hsa-miR-1193	1	4	1.18283	31.8104	26.8934
hsa-miR-208b-3p	1	4	1.18283	31.8104	26.8934
hsa-miR-3188	2	8	2.36567	63.6208	26.8934
hsa-miR-3692-5p	1	4	1.18283	31.8104	26.8934
hsa-miR-4257	1	4	1.18283	31.8104	26.8934
hsa-miR-4496	1	4	1.18283	31.8104	26.8934
hsa-miR-4650-3p	1	4	1.18283	31.8104	26.8934
hsa-miR-4650-3p	1	4	1.18283	31.8104	26.8934
hsa-miR-4695-5p	1	4	1.18283	31.8104	26.8934
hsa-miR-4716-3p	2	8	2.36567	63.6208	26.8934
hsa-miR-4721	1	4	1.18283	31.8104	26.8934
hsa-miR-4739	2	8	2.36567	63.6208	26.8934
hsa-miR-4793-3p	1	4	1.18283	31.8104	26.8934
hsa-miR-493-3p	1	4	1.18283	31.8104	26.8934
hsa-miR-6130	1	4	1.18283	31.8104	26.8934
hsa-miR-6133	1	4	1.18283	31.8104	26.8934
hsa-miR-6508-3p	2	8	2.36567	63.6208	26.8934
hsa-miR-6749-5p	1	4	1.18283	31.8104	26.8934
hsa-miR-6790-5p	1	4	1.18283	31.8104	26.8934
hsa-miR-6808-5p	1	4	1.18283	31.8104	26.8934
hsa-miR-6830-5p	1	4	1.18283	31.8104	26.8934
hsa-miR-6859-5p	1	4	1.18283	31.8104	26.8934
hsa-miR-6859-5p	1	4	1.18283	31.8104	26.8934
hsa-miR-6859-5p	1	4	1.18283	31.8104	26.8934
hsa-miR-6859-5p	1	4	1.18283	31.8104	26.8934
hsa-miR-1468-5p	6	24	7.097	190.862	26.8934
hsa-miR-205-5p	3	12	3.5485	95.4312	26.8934
hsa-miR-216a-3p	3	12	3.5485	95.4312	26.8934
hsa-miR-5699-3p	385	1503	455.391	11952.8	26.2473
hsa-miR-7847-3p	6	23	7.097	182.91	25.7729
hsa-miR-483-5p	4	15	4.73133	119.289	25.2126
hsa-miR-100-5p	22	81	26.0223	644.161	24.7542
hsa-miR-3126-5p	6	22	7.097	174.957	24.6523
hsa-miR-4299	3	11	3.5485	87.4786	24.6523
hsa-miR-8072	3	11	3.5485	87.4786	24.6523
hsa-miR-6089	9	33	10.6455	262.436	24.6523
hsa-miR-6089	9	33	10.6455	262.436	24.6523
hsa-miR-4706	5	18	5.91416	143.147	24.2041
hsa-miR-130a-3p	4	14	4.73133	111.336	23.5317
hsa-miR-4800-5p	2	7	2.36567	55.6682	23.5317
hsa-miR-6740-5p	2	7	2.36567	55.6682	23.5317
hsa-miR-6789-5p	2	7	2.36567	55.6682	23.5317
hsa-miR-5588-5p	3	10	3.5485	79.526	22.4112
hsa-miR-5584-5p	4	13	4.73133	103.384	21.8509
hsa-miR-6867-5p	4	13	4.73133	103.384	21.8509
hsa-miR-6127	3	9	3.5485	71.5734	20.1701
hsa-miR-6793-5p	6	18	7.097	143.147	20.1701
hsa-miR-1294	1	3	1.18283	23.8578	20.1701
hsa-miR-216a-5p	1	3	1.18283	23.8578	20.1701
hsa-miR-23b-5p	1	3	1.18283	23.8578	20.1701
hsa-miR-2682-5p	1	3	1.18283	23.8578	20.1701
hsa-miR-3127-5p	2	6	2.36567	47.7156	20.1701
hsa-miR-3146	1	3	1.18283	23.8578	20.1701
hsa-miR-3153	1	3	1.18283	23.8578	20.1701
hsa-miR-3156-5p	2	6	2.36567	47.7156	20.1701
hsa-miR-3156-5p	2	6	2.36567	47.7156	20.1701
hsa-miR-3156-5p	2	6	2.36567	47.7156	20.1701
hsa-miR-3160-3p	2	6	2.36567	47.7156	20.1701
hsa-miR-3160-3p	2	6	2.36567	47.7156	20.1701
hsa-miR-3617-3p	1	3	1.18283	23.8578	20.1701
hsa-miR-3668	1	3	1.18283	23.8578	20.1701
hsa-miR-3689a-5p	1	3	1.18283	23.8578	20.1701
hsa-miR-3689b-5p	1	3	1.18283	23.8578	20.1701
hsa-miR-3689e	1	3	1.18283	23.8578	20.1701
hsa-miR-4302	1	3	1.18283	23.8578	20.1701
hsa-miR-4444	1	3	1.18283	23.8578	20.1701
hsa-miR-4444	1	3	1.18283	23.8578	20.1701
hsa-miR-4450	2	6	2.36567	47.7156	20.1701
hsa-miR-4520b-3p	1	3	1.18283	23.8578	20.1701
hsa-miR-4646-5p	2	6	2.36567	47.7156	20.1701
hsa-miR-4649-5p	1	3	1.18283	23.8578	20.1701
hsa-miR-4666b	1	3	1.18283	23.8578	20.1701
hsa-miR-4690-5p	1	3	1.18283	23.8578	20.1701
hsa-miR-4778-5p	1	3	1.18283	23.8578	20.1701
hsa-miR-4796-3p	1	3	1.18283	23.8578	20.1701
hsa-miR-4804-5p	2	6	2.36567	47.7156	20.1701
hsa-miR-548ab	4	12	4.73133	95.4312	20.1701
hsa-miR-561-3p	2	6	2.36567	47.7156	20.1701
hsa-miR-5694	2	6	2.36567	47.7156	20.1701
hsa-miR-6769a-5p	1	3	1.18283	23.8578	20.1701
hsa-miR-6792-5p	1	3	1.18283	23.8578	20.1701
hsa-miR-6804-5p	1	3	1.18283	23.8578	20.1701
hsa-miR-6813-5p	1	3	1.18283	23.8578	20.1701
hsa-miR-6835-5p	1	3	1.18283	23.8578	20.1701
hsa-miR-6868-3p	1	3	1.18283	23.8578	20.1701
hsa-miR-939-5p	1	3	1.18283	23.8578	20.1701
hsa-miR-199a-3p	9	27	10.6455	214.72	20.1701
hsa-miR-199a-3p	9	27	10.6455	214.72	20.1701
hsa-miR-199b-3p	9	27	10.6455	214.72	20.1701
hsa-miR-766-5p	5	14	5.91416	111.336	18.8254
hsa-miR-5093	9	25	10.6455	198.815	18.676
hsa-miR-95-5p	3	8	3.5485	63.6208	17.9289
hsa-miR-379-5p	10	26	11.8283	206.768	17.4807
hsa-miR-5699-5p	14	36	16.5597	286.294	17.2886
hsa-miR-184	9	23	10.6455	182.91	17.1819
hsa-miR-1290	1575	3987	1862.96	31707	17.0197
hsa-miR-4436a	2	5	2.36567	39.763	16.8084
hsa-miR-4687-3p	2	5	2.36567	39.763	16.8084
hsa-miR-4728-5p	2	5	2.36567	39.763	16.8084
hsa-miR-4750-5p	2	5	2.36567	39.763	16.8084
hsa-miR-548v	2	5	2.36567	39.763	16.8084
hsa-miR-6085	2	5	2.36567	39.763	16.8084
hsa-miR-6852-5p	2	5	2.36567	39.763	16.8084
hsa-miR-873-3p	6	15	7.097	119.289	16.8084
hsa-miR-6509-5p	5	12	5.91416	95.4312	16.136
hsa-miR-8069	8	19	9.46266	151.099	15.968
hsa-miR-8069	8	19	9.46266	151.099	15.968
hsa-miR-1224-5p	6	14	7.097	111.336	15.6878
hsa-miR-3138	4	9	4.73133	71.5734	15.1275
hsa-miR-4667-5p	4	9	4.73133	71.5734	15.1275
hsa-miR-6747-5p	4	9	4.73133	71.5734	15.1275
hsa-miR-3661	5	11	5.91416	87.4786	14.7914
hsa-miR-6870-5p	36	74	42.582	588.493	13.8202
hsa-miR-3622b-5p	28	57	33.1193	453.298	13.6868
hsa-miR-1228-5p	2	4	2.36567	31.8104	13.4467
hsa-miR-1237-5p	1	2	1.18283	15.9052	13.4467
hsa-miR-1238-5p	2	4	2.36567	31.8104	13.4467
hsa-miR-1253	2	4	2.36567	31.8104	13.4467
hsa-miR-1255a	2	4	2.36567	31.8104	13.4467
hsa-miR-127-3p	2	4	2.36567	31.8104	13.4467
hsa-miR-147a	1	2	1.18283	15.9052	13.4467
hsa-miR-200a-5p	2	4	2.36567	31.8104	13.4467
hsa-miR-3120-5p	1	2	1.18283	15.9052	13.4467
hsa-miR-3131	1	2	1.18283	15.9052	13.4467
hsa-miR-3150a-5p	2	4	2.36567	31.8104	13.4467
hsa-miR-3173-3p	1	2	1.18283	15.9052	13.4467
hsa-miR-3193	2	4	2.36567	31.8104	13.4467
hsa-miR-3611	1	2	1.18283	15.9052	13.4467
hsa-miR-3620-5p	2	4	2.36567	31.8104	13.4467
hsa-miR-3928-3p	1	2	1.18283	15.9052	13.4467
hsa-miR-3936	1	2	1.18283	15.9052	13.4467
hsa-miR-3940-3p	1	2	1.18283	15.9052	13.4467
hsa-miR-3974	1	2	1.18283	15.9052	13.4467
hsa-miR-4418	1	2	1.18283	15.9052	13.4467
hsa-miR-4433b-3p	1	2	1.18283	15.9052	13.4467
hsa-miR-4465	1	2	1.18283	15.9052	13.4467
hsa-miR-4526	1	2	1.18283	15.9052	13.4467
hsa-miR-4671-3p	1	2	1.18283	15.9052	13.4467
hsa-miR-4683	1	2	1.18283	15.9052	13.4467
hsa-miR-4707-5p	1	2	1.18283	15.9052	13.4467
hsa-miR-4709-3p	1	2	1.18283	15.9052	13.4467
hsa-miR-4713-3p	1	2	1.18283	15.9052	13.4467
hsa-miR-4742-5p	2	4	2.36567	31.8104	13.4467
hsa-miR-4745-5p	2	4	2.36567	31.8104	13.4467
hsa-miR-498	1	2	1.18283	15.9052	13.4467
hsa-miR-516b-5p	2	4	2.36567	31.8104	13.4467
hsa-miR-516b-5p	2	4	2.36567	31.8104	13.4467
hsa-miR-517-5p	1	2	1.18283	15.9052	13.4467
hsa-miR-517-5p	1	2	1.18283	15.9052	13.4467
hsa-miR-517-5p	1	2	1.18283	15.9052	13.4467
hsa-miR-518a-5p	1	2	1.18283	15.9052	13.4467
hsa-miR-520d-5p	1	2	1.18283	15.9052	13.4467
hsa-miR-524-5p	1	2	1.18283	15.9052	13.4467
hsa-miR-527	1	2	1.18283	15.9052	13.4467
hsa-miR-5787	2	4	2.36567	31.8104	13.4467
hsa-miR-595	1	2	1.18283	15.9052	13.4467
hsa-miR-6125	1	2	1.18283	15.9052	13.4467
hsa-miR-623	1	2	1.18283	15.9052	13.4467
hsa-miR-644a	1	2	1.18283	15.9052	13.4467
hsa-miR-6516-3p	2	4	2.36567	31.8104	13.4467
hsa-miR-6715a-3p	1	2	1.18283	15.9052	13.4467
hsa-miR-6733-5p	1	2	1.18283	15.9052	13.4467
hsa-miR-6742-5p	1	2	1.18283	15.9052	13.4467
hsa-miR-6743-5p	1	2	1.18283	15.9052	13.4467
hsa-miR-6750-5p	1	2	1.18283	15.9052	13.4467
hsa-miR-6758-5p	1	2	1.18283	15.9052	13.4467
hsa-miR-6776-5p	2	4	2.36567	31.8104	13.4467
hsa-miR-6791-5p	1	2	1.18283	15.9052	13.4467
hsa-miR-6795-5p	2	4	2.36567	31.8104	13.4467
hsa-miR-6797-5p	1	2	1.18283	15.9052	13.4467
hsa-miR-6798-3p	1	2	1.18283	15.9052	13.4467
hsa-miR-6814-5p	1	2	1.18283	15.9052	13.4467
hsa-miR-6850-5p	1	2	1.18283	15.9052	13.4467
hsa-miR-8053	1	2	1.18283	15.9052	13.4467
hsa-miR-8087	1	2	1.18283	15.9052	13.4467
hsa-miR-887-5p	1	2	1.18283	15.9052	13.4467
hsa-miR-888-3p	2	4	2.36567	31.8104	13.4467
hsa-miR-934	1	2	1.18283	15.9052	13.4467
hsa-miR-345-3p	3	6	3.5485	47.7156	13.4467
hsa-miR-3529-5p	3	6	3.5485	47.7156	13.4467
hsa-miR-4497	183	355	216.458	2823.17	13.0426
hsa-miR-3614-3p	72	137	85.164	1089.51	12.793
hsa-miR-5089-5p	6	11	7.097	87.4786	12.3261
hsa-miR-6124	5	9	5.91416	71.5734	12.102
hsa-miR-6884-5p	5	9	5.91416	71.5734	12.102
hsa-miR-3907	22	39	26.0223	310.151	11.9187
hsa-miR-92a-1-5p	97	170	114.735	1351.94	11.7832
hsa-miR-4650-5p	4	7	4.73133	55.6682	11.7659
hsa-miR-4650-5p	4	7	4.73133	55.6682	11.7659
hsa-miR-548am-3p	4	7	4.73133	55.6682	11.7659
hsa-miR-584-5p	14	24	16.5597	190.862	11.5257
hsa-miR-206	3	5	3.5485	39.763	11.2056
hsa-miR-3187-5p	3	5	3.5485	39.763	11.2056
hsa-miR-1226-5p	8	13	9.46266	103.384	10.9254
hsa-miR-199a-5p	5	8	5.91416	63.6208	10.7574
hsa-miR-199a-5p	5	8	5.91416	63.6208	10.7574
hsa-let-7d-5p	35	55	41.3991	437.393	10.5653
hsa-miR-1287-5p	13	20	15.3768	159.052	10.3436
hsa-miR-409-3p	13	20	15.3768	159.052	10.3436
hsa-miR-4419b	6	9	7.097	71.5734	10.085
hsa-miR-1229-5p	2	3	2.36567	23.8578	10.085
hsa-miR-1255b-5p	4	6	4.73133	47.7156	10.085
hsa-miR-1827	2	3	2.36567	23.8578	10.085
hsa-miR-2276-3p	2	3	2.36567	23.8578	10.085
hsa-miR-3122	2	3	2.36567	23.8578	10.085
hsa-miR-3155a	2	3	2.36567	23.8578	10.085
hsa-miR-4538	2	3	2.36567	23.8578	10.085
hsa-miR-4689	2	3	2.36567	23.8578	10.085
hsa-miR-4722-5p	2	3	2.36567	23.8578	10.085
hsa-miR-488-3p	2	3	2.36567	23.8578	10.085
hsa-miR-493-5p	2	3	2.36567	23.8578	10.085
hsa-miR-514a-5p	2	3	2.36567	23.8578	10.085
hsa-miR-514a-5p	2	3	2.36567	23.8578	10.085
hsa-miR-514a-5p	2	3	2.36567	23.8578	10.085
hsa-miR-5195-3p	2	3	2.36567	23.8578	10.085
hsa-miR-5693	2	3	2.36567	23.8578	10.085
hsa-miR-608	2	3	2.36567	23.8578	10.085
hsa-miR-6165	2	3	2.36567	23.8578	10.085
hsa-miR-6759-5p	2	3	2.36567	23.8578	10.085
hsa-miR-6769b-5p	4	6	4.73133	47.7156	10.085
hsa-miR-6861-3p	4	6	4.73133	47.7156	10.085
hsa-miR-3141	7	10	8.27983	79.526	9.60479
hsa-miR-136-5p	10	14	11.8283	111.336	9.41269
hsa-miR-652-5p	5	7	5.91416	55.6682	9.41269
hsa-miR-550a-3p	55	76	65.0558	604.398	9.29045
hsa-miR-550a-3p	55	76	65.0558	604.398	9.29045
hsa-miR-550a-3p	55	76	65.0558	604.398	9.29045
hsa-miR-1185-2-3p	3	4	3.5485	31.8104	8.96447
hsa-miR-4658	3	4	3.5485	31.8104	8.96447
hsa-miR-4726-5p	3	4	3.5485	31.8104	8.96447
hsa-miR-664b-5p	3	4	3.5485	31.8104	8.96447
hsa-miR-6763-5p	3	4	3.5485	31.8104	8.96447
hsa-miR-6803-5p	3	4	3.5485	31.8104	8.96447
hsa-miR-548l	27	36	31.9365	286.294	8.96447
hsa-miR-3169	9	12	10.6455	95.4312	8.96447
hsa-let-7c-5p	179	236	211.727	1876.81	8.86431
hsa-miR-6765-3p	137	173	162.048	1375.8	8.49007
hsa-miR-1255b-5p	4	5	4.73133	39.763	8.40419
hsa-miR-5001-5p	4	5	4.73133	39.763	8.40419
hsa-miR-6090	4	5	4.73133	39.763	8.40419
hsa-miR-624-3p	4	5	4.73133	39.763	8.40419
hsa-miR-7106-5p	24	29	28.388	230.625	8.12405
hsa-miR-1185-1-3p	5	6	5.91416	47.7156	8.06802
hsa-miR-320e	20	24	23.6567	190.862	8.06802
hsa-miR-6847-5p	5	6	5.91416	47.7156	8.06802
hsa-miR-149-3p	11	13	13.0112	103.384	7.94578
hsa-miR-1286	6	7	7.097	55.6682	7.84391
hsa-let-7i-5p	310	338	366.678	2687.98	7.33062
hsa-miR-557	59	64	69.7871	508.967	7.29313
hsa-miR-369-3p	15	16	17.7425	127.242	7.17158
hsa-miR-3613-3p	174	183	205.813	1455.33	7.07111
hsa-miR-598-3p	100	104	118.283	827.071	6.99229
hsa-miR-641	39	40	46.1305	318.104	6.89575
hsa-miR-106a-5p	290	297	343.022	2361.92	6.88564
hsa-miR-1343-3p	7	7	8.27983	55.6682	6.72335
hsa-miR-6086	7	7	8.27983	55.6682	6.72335
hsa-miR-1182	2	2	2.36567	15.9052	6.72335
hsa-miR-1183	1	1	1.18283	7.9526	6.72335
hsa-miR-1197	1	1	1.18283	7.9526	6.72335
hsa-miR-1256	2	2	2.36567	15.9052	6.72335
hsa-miR-127-5p	2	2	2.36567	15.9052	6.72335
hsa-miR-1277-3p	2	2	2.36567	15.9052	6.72335
hsa-miR-1302	1	1	1.18283	7.9526	6.72335
hsa-miR-1302	1	1	1.18283	7.9526	6.72335
hsa-miR-1321	1	1	1.18283	7.9526	6.72335
hsa-miR-1322	1	1	1.18283	7.9526	6.72335
hsa-miR-133a-5p	1	1	1.18283	7.9526	6.72335
hsa-miR-133a-5p	1	1	1.18283	7.9526	6.72335
hsa-miR-1471	1	1	1.18283	7.9526	6.72335
hsa-miR-153-3p	1	1	1.18283	7.9526	6.72335
hsa-miR-153-3p	1	1	1.18283	7.9526	6.72335
hsa-miR-153-5p	2	2	2.36567	15.9052	6.72335
hsa-miR-1913	1	1	1.18283	7.9526	6.72335
hsa-miR-202-3p	1	1	1.18283	7.9526	6.72335
hsa-miR-204-3p	2	2	2.36567	15.9052	6.72335
hsa-miR-208a-3p	1	1	1.18283	7.9526	6.72335
hsa-miR-29b-1-5p	1	1	1.18283	7.9526	6.72335
hsa-miR-302a-3p	1	1	1.18283	7.9526	6.72335
hsa-miR-30b-3p	32	32	37.8507	254.483	6.72335
hsa-miR-3136-5p	1	1	1.18283	7.9526	6.72335
hsa-miR-3158-5p	1	1	1.18283	7.9526	6.72335
hsa-miR-3186-5p	1	1	1.18283	7.9526	6.72335
hsa-miR-3190-3p	1	1	1.18283	7.9526	6.72335
hsa-miR-3605-5p	4	4	4.73133	31.8104	6.72335
hsa-miR-3622a-5p	2	2	2.36567	15.9052	6.72335
hsa-miR-3667-5p	1	1	1.18283	7.9526	6.72335
hsa-miR-3681-5p	1	1	1.18283	7.9526	6.72335
hsa-miR-371a-3p	1	1	1.18283	7.9526	6.72335
hsa-miR-376a-5p	1	1	1.18283	7.9526	6.72335
hsa-miR-376b-3p	2	2	2.36567	15.9052	6.72335
hsa-miR-378b	1	1	1.18283	7.9526	6.72335
hsa-miR-412-5p	1	1	1.18283	7.9526	6.72335
hsa-miR-4251	1	1	1.18283	7.9526	6.72335
hsa-miR-429	4	4	4.73133	31.8104	6.72335
hsa-miR-4291	2	2	2.36567	15.9052	6.72335
hsa-miR-4310	2	2	2.36567	15.9052	6.72335
hsa-miR-4311	1	1	1.18283	7.9526	6.72335
hsa-miR-4487	1	1	1.18283	7.9526	6.72335
hsa-miR-449b-3p	1	1	1.18283	7.9526	6.72335
hsa-miR-4527	4	4	4.73133	31.8104	6.72335
hsa-miR-4662b	2	2	2.36567	15.9052	6.72335
hsa-miR-4674	1	1	1.18283	7.9526	6.72335
hsa-miR-4681	1	1	1.18283	7.9526	6.72335
hsa-miR-4688	1	1	1.18283	7.9526	6.72335
hsa-miR-4712-3p	1	1	1.18283	7.9526	6.72335
hsa-miR-4716-5p	1	1	1.18283	7.9526	6.72335
hsa-miR-4752	1	1	1.18283	7.9526	6.72335
hsa-miR-487a-3p	1	1	1.18283	7.9526	6.72335
hsa-miR-487b-3p	1	1	1.18283	7.9526	6.72335
hsa-miR-488-5p	1	1	1.18283	7.9526	6.72335
hsa-miR-499b-5p	1	1	1.18283	7.9526	6.72335
hsa-miR-5002-5p	2	2	2.36567	15.9052	6.72335
hsa-miR-5004-3p	1	1	1.18283	7.9526	6.72335
hsa-miR-5006-3p	1	1	1.18283	7.9526	6.72335
hsa-miR-504-5p	4	4	4.73133	31.8104	6.72335
hsa-miR-507	2	2	2.36567	15.9052	6.72335
hsa-miR-509-3p	1	1	1.18283	7.9526	6.72335
hsa-miR-509-3p	1	1	1.18283	7.9526	6.72335
hsa-miR-509-3p	1	1	1.18283	7.9526	6.72335
hsa-miR-5090	1	1	1.18283	7.9526	6.72335
hsa-miR-510-5p	1	1	1.18283	7.9526	6.72335
hsa-miR-520d-3p	2	2	2.36567	15.9052	6.72335
hsa-miR-522-3p	1	1	1.18283	7.9526	6.72335
hsa-miR-526b-5p	1	1	1.18283	7.9526	6.72335
hsa-miR-541-3p	1	1	1.18283	7.9526	6.72335
hsa-miR-548aj-3p	1	1	1.18283	7.9526	6.72335
hsa-miR-548ar-3p	1	1	1.18283	7.9526	6.72335
hsa-miR-548at-5p	2	2	2.36567	15.9052	6.72335
hsa-miR-549a	1	1	1.18283	7.9526	6.72335
hsa-miR-556-5p	8	8	9.46266	63.6208	6.72335
hsa-miR-5689	1	1	1.18283	7.9526	6.72335
hsa-miR-588	1	1	1.18283	7.9526	6.72335
hsa-miR-6088	2	2	2.36567	15.9052	6.72335
hsa-miR-613	2	2	2.36567	15.9052	6.72335
hsa-miR-6134	1	1	1.18283	7.9526	6.72335
hsa-miR-622	1	1	1.18283	7.9526	6.72335
hsa-miR-647	1	1	1.18283	7.9526	6.72335
hsa-miR-6512-5p	1	1	1.18283	7.9526	6.72335
hsa-miR-654-5p	2	2	2.36567	15.9052	6.72335
hsa-miR-6728-3p	1	1	1.18283	7.9526	6.72335
hsa-miR-6740-3p	1	1	1.18283	7.9526	6.72335
hsa-miR-6751-3p	1	1	1.18283	7.9526	6.72335
hsa-miR-6753-3p	1	1	1.18283	7.9526	6.72335
hsa-miR-6764-5p	1	1	1.18283	7.9526	6.72335
hsa-miR-6766-5p	1	1	1.18283	7.9526	6.72335
hsa-miR-6780a-5p	1	1	1.18283	7.9526	6.72335
hsa-miR-6783-5p	1	1	1.18283	7.9526	6.72335
hsa-miR-6805-3p	2	2	2.36567	15.9052	6.72335
hsa-miR-6806-5p	1	1	1.18283	7.9526	6.72335
hsa-miR-6820-5p	1	1	1.18283	7.9526	6.72335
hsa-miR-6823-3p	1	1	1.18283	7.9526	6.72335
hsa-miR-6825-3p	1	1	1.18283	7.9526	6.72335
hsa-miR-6826-5p	4	4	4.73133	31.8104	6.72335
hsa-miR-6832-3p	1	1	1.18283	7.9526	6.72335
hsa-miR-6837-3p	1	1	1.18283	7.9526	6.72335
hsa-miR-6838-3p	1	1	1.18283	7.9526	6.72335
hsa-miR-6839-3p	1	1	1.18283	7.9526	6.72335
hsa-miR-6849-5p	1	1	1.18283	7.9526	6.72335
hsa-miR-6851-3p	1	1	1.18283	7.9526	6.72335
hsa-miR-6855-5p	1	1	1.18283	7.9526	6.72335
hsa-miR-6864-5p	1	1	1.18283	7.9526	6.72335
hsa-miR-6875-5p	1	1	1.18283	7.9526	6.72335
hsa-miR-6880-3p	1	1	1.18283	7.9526	6.72335
hsa-miR-6882-5p	1	1	1.18283	7.9526	6.72335
hsa-miR-6890-5p	1	1	1.18283	7.9526	6.72335
hsa-miR-7-2-3p	1	1	1.18283	7.9526	6.72335
hsa-miR-7109-5p	1	1	1.18283	7.9526	6.72335
hsa-miR-7151-3p	1	1	1.18283	7.9526	6.72335
hsa-miR-7159-5p	1	1	1.18283	7.9526	6.72335
hsa-miR-8055	1	1	1.18283	7.9526	6.72335
hsa-miR-8064	1	1	1.18283	7.9526	6.72335
hsa-miR-873-5p	1	1	1.18283	7.9526	6.72335
hsa-miR-1180-5p	3	3	3.5485	23.8578	6.72335
hsa-miR-124-5p	3	3	3.5485	23.8578	6.72335
hsa-miR-3200-5p	3	3	3.5485	23.8578	6.72335
hsa-miR-3662	3	3	3.5485	23.8578	6.72335
hsa-miR-383-5p	3	3	3.5485	23.8578	6.72335
hsa-miR-4480	3	3	3.5485	23.8578	6.72335
hsa-miR-494-3p	3	3	3.5485	23.8578	6.72335
hsa-miR-5197-3p	3	3	3.5485	23.8578	6.72335
hsa-miR-543	6	6	7.097	47.7156	6.72335
hsa-miR-545-3p	3	3	3.5485	23.8578	6.72335
hsa-miR-548ah-3p	6	6	7.097	47.7156	6.72335
hsa-miR-4457	5	5	5.91416	39.763	6.72335
hsa-miR-4762-3p	5	5	5.91416	39.763	6.72335
hsa-miR-6739-5p	5	5	5.91416	39.763	6.72335
hsa-miR-4668-5p	26	26	30.7537	206.768	6.72335
hsa-miR-875-5p	53	49	62.6901	389.678	6.21593
hsa-miR-25-5p	365	335	431.734	2664.12	6.17075
hsa-miR-3653	65	58	76.8841	461.251	5.9993
hsa-miR-320d	44	39	52.0446	310.151	5.95934
hsa-miR-320d	44	39	52.0446	310.151	5.95934
hsa-miR-4669	23	20	27.2052	159.052	5.84639
hsa-miR-548f-3p	7	6	8.27983	47.7156	5.76287
hsa-miR-320b	123	105	145.488	835.023	5.73945
hsa-miR-1273g-5p	6	5	7.097	39.763	5.60279
hsa-miR-3145-3p	6	5	7.097	39.763	5.60279
hsa-miR-505-5p	16	13	18.9253	103.384	5.46272
hsa-miR-320b	133	108	157.317	858.881	5.45956
hsa-miR-486-5p	406	328	480.23	2608.45	5.43167
hsa-miR-486-5p	402	315	475.499	2505.07	5.2683
hsa-miR-4463	9	7	10.6455	55.6682	5.22927
hsa-miR-663b	9	7	10.6455	55.6682	5.22927
hsa-miR-3679-5p	12	9	14.194	71.5734	5.04251
hsa-miR-1288-3p	4	3	4.73133	23.8578	5.04251
hsa-miR-3651	4	3	4.73133	23.8578	5.04251
hsa-miR-4440	4	3	4.73133	23.8578	5.04251
hsa-miR-4697-3p	4	3	4.73133	23.8578	5.04251
hsa-miR-6747-3p	4	3	4.73133	23.8578	5.04251
hsa-miR-6850-3p	4	3	4.73133	23.8578	5.04251
hsa-miR-4508	19	14	22.4738	111.336	4.95405
hsa-miR-320a	2070	1523	2448.46	12111.8	4.9467
hsa-let-7d-3p	28	20	33.1193	159.052	4.80239
hsa-miR-411-3p	22	15	26.0223	119.289	4.5841
hsa-miR-320c	69	47	81.6155	373.772	4.57968
hsa-miR-124-5p	3	2	3.5485	15.9052	4.48224
hsa-miR-124-5p	3	2	3.5485	15.9052	4.48224
hsa-miR-2115-5p	3	2	3.5485	15.9052	4.48224
hsa-miR-3144-5p	3	2	3.5485	15.9052	4.48224
hsa-miR-3652	3	2	3.5485	15.9052	4.48224
hsa-miR-372-3p	3	2	3.5485	15.9052	4.48224
hsa-miR-379-3p	3	2	3.5485	15.9052	4.48224
hsa-miR-4423-5p	3	2	3.5485	15.9052	4.48224
hsa-miR-4446-3p	3	2	3.5485	15.9052	4.48224
hsa-miR-4504	3	2	3.5485	15.9052	4.48224
hsa-miR-4665-5p	3	2	3.5485	15.9052	4.48224
hsa-miR-4741	6	4	7.097	31.8104	4.48224
hsa-miR-5088-5p	3	2	3.5485	15.9052	4.48224
hsa-miR-7108-5p	3	2	3.5485	15.9052	4.48224
hsa-miR-96-3p	3	2	3.5485	15.9052	4.48224
hsa-miR-205-3p	9	6	10.6455	47.7156	4.48224
hsa-miR-660-3p	9	6	10.6455	47.7156	4.48224
hsa-miR-320c	75	49	88.7125	389.678	4.39259
hsa-miR-3178	23	15	27.2052	119.289	4.3848
hsa-miR-4454	312	199	369.044	1582.57	4.28829
hsa-miR-26a-1-3p	8	5	9.46266	39.763	4.2021
hsa-miR-4691-3p	8	5	9.46266	39.763	4.2021
hsa-miR-760	16	10	18.9253	79.526	4.2021
hsa-miR-296-3p	81	50	95.8095	397.63	4.15022
hsa-miR-1908-5p	15	9	17.7425	71.5734	4.03401
hsa-miR-8075	15	9	17.7425	71.5734	4.03401
hsa-miR-1257	5	3	5.91416	23.8578	4.03401
hsa-miR-1262	5	3	5.91416	23.8578	4.03401
hsa-miR-552-3p	5	3	5.91416	23.8578	4.03401
hsa-miR-6894-5p	5	3	5.91416	23.8578	4.03401
hsa-miR-4516	174	104	205.813	827.071	4.01856
hsa-let-7e-5p	245	146	289.794	1161.08	4.00657
hsa-miR-1268a	295	174	348.936	1383.75	3.96564
hsa-miR-615-5p	78	46	92.261	365.82	3.96505
hsa-miR-1268b	320	188	378.507	1495.09	3.94997
hsa-miR-6511b-5p	12	7	14.194	55.6682	3.92196
hsa-miR-6511b-5p	12	7	14.194	55.6682	3.92196
hsa-miR-3064-5p	7	4	8.27983	31.8104	3.84192
hsa-miR-4786-5p	7	4	8.27983	31.8104	3.84192
hsa-miR-548y	7	4	8.27983	31.8104	3.84192
hsa-miR-7113-5p	7	4	8.27983	31.8104	3.84192
hsa-miR-6724-5p	55	31	65.0558	246.531	3.78953
hsa-miR-6724-5p	55	31	65.0558	246.531	3.78953
hsa-miR-6724-5p	55	31	65.0558	246.531	3.78953
hsa-miR-6724-5p	55	31	65.0558	246.531	3.78953
hsa-miR-128-1-5p	9	5	10.6455	39.763	3.7352
hsa-let-7a-5p	1398	776	1653.6	6171.22	3.73199
hsa-let-7a-5p	1403	778	1659.51	6187.12	3.72827
hsa-let-7a-5p	1396	772	1651.23	6139.41	3.71807
hsa-miR-4700-5p	24	13	28.388	103.384	3.64182
hsa-miR-7704	9845	5220	11645	41512.6	3.56485
hsa-miR-4451	40	21	47.3133	167.005	3.52976
hsa-let-7b-3p	2	1	2.36567	7.9526	3.36168
hsa-miR-103a-2-5p	2	1	2.36567	7.9526	3.36168
hsa-miR-1244	2	1	2.36567	7.9526	3.36168
hsa-miR-1244	2	1	2.36567	7.9526	3.36168
hsa-miR-1244	2	1	2.36567	7.9526	3.36168
hsa-miR-1244	2	1	2.36567	7.9526	3.36168
hsa-miR-1269a	2	1	2.36567	7.9526	3.36168
hsa-miR-1292-3p	2	1	2.36567	7.9526	3.36168
hsa-miR-134-5p	2	1	2.36567	7.9526	3.36168
hsa-miR-154-5p	2	1	2.36567	7.9526	3.36168
hsa-miR-3170	4	2	4.73133	15.9052	3.36168
hsa-miR-3181	2	1	2.36567	7.9526	3.36168
hsa-miR-3191-3p	2	1	2.36567	7.9526	3.36168
hsa-miR-3194-3p	2	1	2.36567	7.9526	3.36168
hsa-miR-3616-5p	2	1	2.36567	7.9526	3.36168
hsa-miR-3664-3p	2	1	2.36567	7.9526	3.36168
hsa-miR-3677-3p	4	2	4.73133	15.9052	3.36168
hsa-miR-3910	2	1	2.36567	7.9526	3.36168
hsa-miR-3910	2	1	2.36567	7.9526	3.36168
hsa-miR-3922-5p	2	1	2.36567	7.9526	3.36168
hsa-miR-4309	2	1	2.36567	7.9526	3.36168
hsa-miR-4419a	2	1	2.36567	7.9526	3.36168
hsa-miR-4433-3p	2	1	2.36567	7.9526	3.36168
hsa-miR-4456	2	1	2.36567	7.9526	3.36168
hsa-miR-4494	2	1	2.36567	7.9526	3.36168
hsa-miR-4501	4	2	4.73133	15.9052	3.36168
hsa-miR-4634	4	2	4.73133	15.9052	3.36168
hsa-miR-4660	2	1	2.36567	7.9526	3.36168
hsa-miR-4701-3p	2	1	2.36567	7.9526	3.36168
hsa-miR-4710	2	1	2.36567	7.9526	3.36168
hsa-miR-4738-3p	2	1	2.36567	7.9526	3.36168
hsa-miR-4766-5p	2	1	2.36567	7.9526	3.36168
hsa-miR-495-3p	2	1	2.36567	7.9526	3.36168
hsa-miR-499a-3p	2	1	2.36567	7.9526	3.36168
hsa-miR-500b-3p	2	1	2.36567	7.9526	3.36168
hsa-miR-5194	2	1	2.36567	7.9526	3.36168
hsa-miR-548ag	2	1	2.36567	7.9526	3.36168
hsa-miR-548d-3p	2	1	2.36567	7.9526	3.36168
hsa-miR-548d-3p	2	1	2.36567	7.9526	3.36168
hsa-miR-5697	2	1	2.36567	7.9526	3.36168
hsa-miR-580-3p	4	2	4.73133	15.9052	3.36168
hsa-miR-602	2	1	2.36567	7.9526	3.36168
hsa-miR-6128	2	1	2.36567	7.9526	3.36168
hsa-miR-638	2	1	2.36567	7.9526	3.36168
hsa-miR-639	4	2	4.73133	15.9052	3.36168
hsa-miR-645	2	1	2.36567	7.9526	3.36168
hsa-miR-659-5p	4	2	4.73133	15.9052	3.36168
hsa-miR-6770-3p	2	1	2.36567	7.9526	3.36168
hsa-miR-6770-3p	2	1	2.36567	7.9526	3.36168
hsa-miR-6770-3p	2	1	2.36567	7.9526	3.36168
hsa-miR-6805-5p	2	1	2.36567	7.9526	3.36168
hsa-miR-6809-5p	2	1	2.36567	7.9526	3.36168
hsa-miR-6832-5p	2	1	2.36567	7.9526	3.36168
hsa-miR-6836-5p	2	1	2.36567	7.9526	3.36168
hsa-miR-6839-5p	2	1	2.36567	7.9526	3.36168
hsa-miR-6860	2	1	2.36567	7.9526	3.36168
hsa-miR-6877-5p	2	1	2.36567	7.9526	3.36168
hsa-miR-7114-5p	2	1	2.36567	7.9526	3.36168
hsa-miR-762	2	1	2.36567	7.9526	3.36168
hsa-miR-767-3p	4	2	4.73133	15.9052	3.36168
hsa-miR-7702	2	1	2.36567	7.9526	3.36168
hsa-miR-7851-3p	8	4	9.46266	31.8104	3.36168
hsa-miR-887-3p	4	2	4.73133	15.9052	3.36168
hsa-miR-204-5p	12	6	14.194	47.7156	3.36168
hsa-miR-4647	6	3	7.097	23.8578	3.36168
hsa-miR-4695-3p	12	6	14.194	47.7156	3.36168
hsa-miR-548az-5p	6	3	7.097	23.8578	3.36168
hsa-miR-627-5p	6	3	7.097	23.8578	3.36168
hsa-miR-6511a-5p	12	6	14.194	47.7156	3.36168
hsa-miR-6511a-5p	12	6	14.194	47.7156	3.36168
hsa-miR-6511a-5p	12	6	14.194	47.7156	3.36168
hsa-miR-6511a-5p	12	6	14.194	47.7156	3.36168
hsa-miR-19a-5p	40	20	47.3133	159.052	3.36168
hsa-miR-1246	5032	2441	5952.01	19412.3	3.26147
hsa-miR-574-5p	344	166	406.894	1320.13	3.24441
hsa-miR-4449	32	15	37.8507	119.289	3.15157
hsa-miR-1	35	16	41.3991	127.242	3.07353
hsa-miR-1277-5p	33	15	39.0335	119.289	3.05607
hsa-miR-99a-3p	11	5	13.0112	39.763	3.05607
hsa-miR-4447	62	28	73.3356	222.673	3.03635
hsa-miR-33a-5p	54	24	63.873	190.862	2.98816
hsa-miR-2861	9	4	10.6455	31.8104	2.98816
hsa-miR-6515-5p	9	4	10.6455	31.8104	2.98816
hsa-miR-98-5p	52	23	61.5073	182.91	2.97379
hsa-miR-1250-5p	16	7	18.9253	55.6682	2.94147
hsa-miR-1	35	15	41.3991	119.289	2.88144
hsa-miR-1299	14	6	16.5597	47.7156	2.88144
hsa-miR-3130-5p	7	3	8.27983	23.8578	2.88144
hsa-miR-4684-3p	7	3	8.27983	23.8578	2.88144
hsa-miR-573	7	3	8.27983	23.8578	2.88144
hsa-miR-542-3p	197	84	233.018	668.019	2.86681
hsa-miR-342-5p	19	8	22.4738	63.6208	2.83089
hsa-miR-5100	576	242	681.312	1924.53	2.82474
hsa-miR-605-3p	12	5	14.194	39.763	2.8014
hsa-miR-423-5p	3225	1327	3814.64	10553.1	2.76648
hsa-miR-1343-5p	39	16	46.1305	127.242	2.7583
hsa-miR-4715-5p	15	6	17.7425	47.7156	2.68934
hsa-miR-548h-5p	15	6	17.7425	47.7156	2.68934
hsa-miR-3130-5p	5	2	5.91416	15.9052	2.68934
hsa-miR-3144-3p	5	2	5.91416	15.9052	2.68934
hsa-miR-3665	10	4	11.8283	31.8104	2.68934
hsa-miR-378g	10	4	11.8283	31.8104	2.68934
hsa-miR-4639-5p	5	2	5.91416	15.9052	2.68934
hsa-miR-4664-3p	5	2	5.91416	15.9052	2.68934
hsa-miR-668-3p	5	2	5.91416	15.9052	2.68934
hsa-miR-6723-5p	5	2	5.91416	15.9052	2.68934
hsa-miR-874-5p	5	2	5.91416	15.9052	2.68934
hsa-miR-26b-3p	13	5	15.3768	39.763	2.5859
hsa-miR-642a-3p	13	5	15.3768	39.763	2.5859
hsa-miR-3182	315	121	372.592	962.265	2.58262
hsa-miR-3177-3p	50	19	59.1416	151.099	2.55487
hsa-miR-1295a	8	3	9.46266	23.8578	2.52126
hsa-miR-199b-5p	16	6	18.9253	47.7156	2.52126
hsa-miR-410-5p	8	3	9.46266	23.8578	2.52126
hsa-miR-24-2-5p	19	7	22.4738	55.6682	2.47702
hsa-miR-138-5p	11	4	13.0112	31.8104	2.44486
hsa-miR-22-5p	11	4	13.0112	31.8104	2.44486
hsa-miR-301a-5p	11	4	13.0112	31.8104	2.44486
hsa-miR-7977	212	76	250.761	604.398	2.41026
hsa-miR-877-5p	56	20	66.2386	159.052	2.4012
hsa-miR-222-5p	61	21	72.1528	167.005	2.3146
hsa-let-7f-2-3p	3	1	3.5485	7.9526	2.24112
hsa-let-7i-3p	3	1	3.5485	7.9526	2.24112
hsa-miR-152-5p	3	1	3.5485	7.9526	2.24112
hsa-miR-3150a-3p	3	1	3.5485	7.9526	2.24112
hsa-miR-3155b	3	1	3.5485	7.9526	2.24112
hsa-miR-34a-3p	6	2	7.097	15.9052	2.24112
hsa-miR-3607-3p	3	1	3.5485	7.9526	2.24112
hsa-miR-3659	3	1	3.5485	7.9526	2.24112
hsa-miR-3677-5p	3	1	3.5485	7.9526	2.24112
hsa-miR-3690	3	1	3.5485	7.9526	2.24112
hsa-miR-3690	3	1	3.5485	7.9526	2.24112
hsa-miR-3943	3	1	3.5485	7.9526	2.24112
hsa-miR-4306	3	1	3.5485	7.9526	2.24112
hsa-miR-452-5p	12	4	14.194	31.8104	2.24112
hsa-miR-4677-5p	3	1	3.5485	7.9526	2.24112
hsa-miR-4733-5p	3	1	3.5485	7.9526	2.24112
hsa-miR-5009-5p	3	1	3.5485	7.9526	2.24112
hsa-miR-548aq-5p	3	1	3.5485	7.9526	2.24112
hsa-miR-548h-3p	6	2	7.097	15.9052	2.24112
hsa-miR-548z	6	2	7.097	15.9052	2.24112
hsa-miR-551a	6	2	7.097	15.9052	2.24112
hsa-miR-616-3p	3	1	3.5485	7.9526	2.24112
hsa-miR-6511a-3p	3	1	3.5485	7.9526	2.24112
hsa-miR-6511a-3p	3	1	3.5485	7.9526	2.24112
hsa-miR-6511a-3p	3	1	3.5485	7.9526	2.24112
hsa-miR-6511a-3p	3	1	3.5485	7.9526	2.24112
hsa-miR-7854-3p	3	1	3.5485	7.9526	2.24112
hsa-miR-92b-5p	93	31	110.003	246.531	2.24112
hsa-miR-943	3	1	3.5485	7.9526	2.24112
hsa-miR-1915-3p	21	7	24.8395	55.6682	2.24112
hsa-miR-218-1-3p	21	7	24.8395	55.6682	2.24112
hsa-miR-4659a-3p	9	3	10.6455	23.8578	2.24112
hsa-miR-548b-3p	30	10	35.485	79.526	2.24112
hsa-miR-3196	61	20	72.1528	159.052	2.20438
hsa-miR-548ay-5p	35	11	41.3991	87.4786	2.11305
hsa-miR-550a-3-5p	35	11	41.3991	87.4786	2.11305
hsa-miR-139-5p	154	47	182.156	373.772	2.05193
hsa-miR-186-3p	20	6	23.6567	47.7156	2.01701
hsa-miR-33b-5p	110	33	130.112	262.436	2.01701
hsa-miR-888-5p	10	3	11.8283	23.8578	2.01701
hsa-miR-1908-3p	31	9	36.6678	71.5734	1.95194
hsa-miR-193b-5p	56	16	66.2386	127.242	1.92096
hsa-miR-196b-3p	7	2	8.27983	15.9052	1.92096
hsa-miR-2355-5p	7	2	8.27983	15.9052	1.92096
hsa-miR-503-3p	7	2	8.27983	15.9052	1.92096
hsa-miR-548ag	7	2	8.27983	15.9052	1.92096
hsa-miR-548w	7	2	8.27983	15.9052	1.92096
hsa-miR-578	7	2	8.27983	15.9052	1.92096
hsa-miR-663a	14	4	16.5597	31.8104	1.92096
hsa-miR-6801-5p	7	2	8.27983	15.9052	1.92096
hsa-miR-676-3p	21	6	24.8395	47.7156	1.92096
hsa-miR-4286	105	30	124.197	238.578	1.92096
hsa-miR-224-5p	81	23	95.8095	182.91	1.9091
hsa-miR-125a-3p	18	5	21.291	39.763	1.8676
hsa-miR-3656	201	55	237.749	437.393	1.83972
hsa-miR-4766-3p	11	3	13.0112	23.8578	1.83364
hsa-miR-548j-5p	11	3	13.0112	23.8578	1.83364
hsa-miR-597-3p	11	3	13.0112	23.8578	1.83364
hsa-miR-6516-5p	11	3	13.0112	23.8578	1.83364
hsa-miR-4787-5p	55	15	65.0558	119.289	1.83364
hsa-miR-4492	74	20	87.5296	159.052	1.81712
hsa-miR-191-3p	15	4	17.7425	31.8104	1.79289
hsa-miR-449b-5p	15	4	17.7425	31.8104	1.79289
hsa-miR-4448	1012	268	1197.03	2131.3	1.78049
hsa-miR-548d-5p	57	15	67.4215	119.289	1.7693
hsa-miR-126-3p	840	220	993.58	1749.57	1.76088
hsa-miR-548d-5p	54	14	63.873	111.336	1.74309
hsa-miR-138-5p	35	9	41.3991	71.5734	1.72886
hsa-miR-767-5p	28	7	33.1193	55.6682	1.68084
hsa-miR-1229-3p	4	1	4.73133	7.9526	1.68084
hsa-miR-125b-1-3p	4	1	4.73133	7.9526	1.68084
hsa-miR-1273a	8	2	9.46266	15.9052	1.68084
hsa-miR-217	4	1	4.73133	7.9526	1.68084
hsa-miR-2278	8	2	9.46266	15.9052	1.68084
hsa-miR-3135a	4	1	4.73133	7.9526	1.68084
hsa-miR-3201	4	1	4.73133	7.9526	1.68084
hsa-miR-3614-5p	4	1	4.73133	7.9526	1.68084
hsa-miR-374c-5p	8	2	9.46266	15.9052	1.68084
hsa-miR-376a-3p	4	1	4.73133	7.9526	1.68084
hsa-miR-376a-3p	4	1	4.73133	7.9526	1.68084
hsa-miR-4254	4	1	4.73133	7.9526	1.68084
hsa-miR-4330	4	1	4.73133	7.9526	1.68084
hsa-miR-4426	8	2	9.46266	15.9052	1.68084
hsa-miR-4783-3p	8	2	9.46266	15.9052	1.68084
hsa-miR-548a-5p	4	1	4.73133	7.9526	1.68084
hsa-miR-651-5p	4	1	4.73133	7.9526	1.68084
hsa-miR-6796-3p	8	2	9.46266	15.9052	1.68084
hsa-miR-7108-3p	4	1	4.73133	7.9526	1.68084
hsa-miR-877-3p	4	1	4.73133	7.9526	1.68084
hsa-miR-936	4	1	4.73133	7.9526	1.68084
hsa-miR-939-3p	4	1	4.73133	7.9526	1.68084
hsa-miR-1273f	12	3	14.194	23.8578	1.68084
hsa-miR-499a-5p	12	3	14.194	23.8578	1.68084
hsa-miR-561-5p	12	3	14.194	23.8578	1.68084
hsa-miR-5585-3p	20	5	23.6567	39.763	1.68084
hsa-miR-1304-5p	57	14	67.4215	111.336	1.65135
hsa-miR-6126	57	14	67.4215	111.336	1.65135
hsa-miR-744-5p	796	190	941.535	1510.99	1.60482
hsa-miR-3074-3p	21	5	24.8395	39.763	1.6008
hsa-miR-181b-5p	679	161	803.143	1280.37	1.5942
hsa-miR-618	17	4	20.1082	31.8104	1.58197
hsa-miR-20b-5p	13	3	15.3768	23.8578	1.55154
hsa-miR-551b-3p	26	6	30.7537	47.7156	1.55154
hsa-miR-4421	22	5	26.0223	39.763	1.52803
hsa-miR-3960	231	52	273.234	413.535	1.51348
hsa-miR-27a-5p	27	6	31.9365	47.7156	1.49408
hsa-miR-33b-3p	27	6	31.9365	47.7156	1.49408
hsa-miR-545-5p	9	2	10.6455	15.9052	1.49408
hsa-miR-6087	343	76	405.712	604.398	1.48972
hsa-miR-27b-5p	122	27	144.306	214.72	1.48796
hsa-miR-4488	324	71	383.238	564.635	1.47333
hsa-miR-1273g-3p	32	7	37.8507	55.6682	1.47073
hsa-miR-1306-5p	32	7	37.8507	55.6682	1.47073
hsa-miR-200c-3p	69	15	81.6155	119.289	1.4616
hsa-miR-1273c	14	3	16.5597	23.8578	1.44072
hsa-miR-19a-3p	494	105	584.319	835.023	1.42905
hsa-miR-582-3p	38	8	44.9476	63.6208	1.41544
hsa-miR-6720-3p	19	4	22.4738	31.8104	1.41544
hsa-miR-671-5p	144	30	170.328	238.578	1.4007
hsa-miR-1275	298	62	352.484	493.061	1.39882
hsa-miR-374a-3p	29	6	34.3022	47.7156	1.39104
hsa-let-7f-5p	2366	488	2798.58	3880.87	1.38673
hsa-let-7f-5p	2328	474	2753.63	3769.53	1.36893
hsa-miR-200a-3p	15	3	17.7425	23.8578	1.34467
hsa-miR-548h-5p	15	3	17.7425	23.8578	1.34467
hsa-miR-548h-5p	15	3	17.7425	23.8578	1.34467
hsa-miR-548h-5p	15	3	17.7425	23.8578	1.34467
hsa-miR-548h-5p	15	3	17.7425	23.8578	1.34467
hsa-miR-1273e	10	2	11.8283	15.9052	1.34467
hsa-miR-129-1-3p	5	1	5.91416	7.9526	1.34467
hsa-miR-2113	5	1	5.91416	7.9526	1.34467
hsa-miR-29a-5p	5	1	5.91416	7.9526	1.34467
hsa-miR-3173-5p	5	1	5.91416	7.9526	1.34467
hsa-miR-3691-5p	20	4	23.6567	31.8104	1.34467
hsa-miR-4422	5	1	5.91416	7.9526	1.34467
hsa-miR-450a-2-3p	25	5	29.5708	39.763	1.34467
hsa-miR-4517	10	2	11.8283	15.9052	1.34467
hsa-miR-5094	5	1	5.91416	7.9526	1.34467
hsa-miR-653-3p	5	1	5.91416	7.9526	1.34467
hsa-miR-6720-5p	10	2	11.8283	15.9052	1.34467
hsa-miR-937-3p	10	2	11.8283	15.9052	1.34467
hsa-miR-455-5p	126	25	149.037	198.815	1.334
hsa-miR-196a-5p	579	114	684.86	906.597	1.32377
hsa-miR-29c-5p	41	8	48.4961	63.6208	1.31187
hsa-miR-7641	508	99	600.879	787.308	1.31026
hsa-miR-7641	508	99	600.879	787.308	1.31026
hsa-miR-378a-5p	144	28	170.328	222.673	1.30732
hsa-miR-576-3p	67	13	79.2498	103.384	1.30453
hsa-miR-629-5p	88	17	104.089	135.194	1.29883
hsa-miR-664a-3p	57	11	67.4215	87.4786	1.29749
hsa-miR-345-5p	135	26	159.682	206.768	1.29487
hsa-miR-2392	26	5	30.7537	39.763	1.29295
hsa-miR-16-2-3p	247	47	292.16	373.772	1.27934
hsa-miR-449a	32	6	37.8507	47.7156	1.26063
hsa-miR-125b-5p	976	181	1154.44	1439.42	1.24685
hsa-miR-550a-5p	125	23	147.854	182.91	1.2371
hsa-miR-550a-5p	125	23	147.854	182.91	1.2371
hsa-miR-125b-5p	979	180	1157.99	1431.47	1.23616
hsa-miR-101-3p	779	142	921.427	1129.27	1.22557
hsa-miR-133a-3p	11	2	13.0112	15.9052	1.22243
hsa-miR-133a-3p	11	2	13.0112	15.9052	1.22243
hsa-miR-141-3p	11	2	13.0112	15.9052	1.22243
hsa-miR-15a-3p	11	2	13.0112	15.9052	1.22243
hsa-miR-2110	55	10	65.0558	79.526	1.22243
hsa-miR-378f	22	4	26.0223	31.8104	1.22243
hsa-miR-3911	11	2	13.0112	15.9052	1.22243
hsa-miR-4655-3p	11	2	13.0112	15.9052	1.22243
hsa-miR-548o-3p	33	6	39.0335	47.7156	1.22243
hsa-miR-548o-3p	33	6	39.0335	47.7156	1.22243
hsa-miR-4787-3p	122	22	144.306	174.957	1.21241
hsa-miR-188-5p	78	14	92.261	111.336	1.20676
hsa-miR-6500-3p	28	5	33.1193	39.763	1.2006
hsa-miR-10b-3p	163	29	192.802	230.625	1.19618
hsa-miR-126-5p	630	112	745.185	890.691	1.19526
hsa-miR-139-3p	34	6	40.2163	47.7156	1.18647
hsa-miR-301b	68	12	80.4326	95.4312	1.18647
hsa-miR-3149	17	3	20.1082	23.8578	1.18647
hsa-miR-491-3p	17	3	20.1082	23.8578	1.18647
hsa-miR-550a-3-5p	125	22	147.854	174.957	1.18331
hsa-miR-550a-3-5p	125	22	147.854	174.957	1.18331
hsa-miR-196a-5p	722	126	854.005	1002.03	1.17333
hsa-miR-1296-3p	23	4	27.2052	31.8104	1.16928
hsa-miR-101-3p	808	140	955.729	1113.36	1.16494
hsa-miR-18b-5p	81	14	95.8095	111.336	1.16206
hsa-miR-574-3p	35	6	41.3991	47.7156	1.15257
hsa-miR-615-3p	516	87	610.342	691.876	1.13359
hsa-let-7a-3p	24	4	28.388	31.8104	1.12056
hsa-let-7a-3p	24	4	28.388	31.8104	1.12056
hsa-miR-1226-3p	6	1	7.097	7.9526	1.12056
hsa-miR-183-3p	24	4	28.388	31.8104	1.12056
hsa-miR-3162-3p	12	2	14.194	15.9052	1.12056
hsa-miR-378e	102	17	120.649	135.194	1.12056
hsa-miR-548c-3p	6	1	7.097	7.9526	1.12056
hsa-miR-1469	30	5	35.485	39.763	1.12056
hsa-miR-146a-5p	30	5	35.485	39.763	1.12056
hsa-miR-502-5p	18	3	21.291	23.8578	1.12056
hsa-miR-577	30	5	35.485	39.763	1.12056
hsa-miR-542-5p	31	5	36.6678	39.763	1.08441
hsa-miR-4746-5p	25	4	29.5708	31.8104	1.07574
hsa-miR-30c-2-3p	19	3	22.4738	23.8578	1.06158
hsa-miR-3157-5p	19	3	22.4738	23.8578	1.06158
hsa-miR-5010-3p	19	3	22.4738	23.8578	1.06158
hsa-miR-378d	235	37	277.966	294.246	1.05857
hsa-miR-3908	89	14	105.272	111.336	1.05761
hsa-miR-16-1-3p	77	12	91.0781	95.4312	1.0478
hsa-miR-671-3p	45	7	53.2275	55.6682	1.04585
hsa-miR-1307-5p	354	55	418.723	437.393	1.04459
hsa-miR-132-5p	13	2	15.3768	15.9052	1.03436
hsa-miR-24-1-5p	13	2	15.3768	15.9052	1.03436
hsa-miR-5684	13	2	15.3768	15.9052	1.03436
hsa-miR-6840-3p	13	2	15.3768	15.9052	1.03436
hsa-miR-378d	244	37	288.611	294.246	1.01952
hsa-miR-590-5p	53	8	62.6901	63.6208	1.01485
hsa-miR-627-3p	40	6	47.3133	47.7156	1.0085
hsa-miR-125a-5p	1484	222	1755.32	1765.48	1.00578
hsa-miR-30c-1-3p	94	14	111.186	111.336	1.00135
hsa-miR-4661-5p	47	7	55.5931	55.6682	1.00135
hsa-miR-4483	1629	242	1926.83	1924.53	0.998804
hsa-miR-551b-5p	27	4	31.9365	31.8104	0.996052
hsa-miR-23a-3p	467	69	552.383	548.73	0.993386
hsa-miR-29c-3p	150	22	177.425	174.957	0.986092
hsa-miR-629-3p	41	6	48.4961	47.7156	0.983905
hsa-miR-19b-3p	2256	328	2668.47	2608.45	0.977509
hsa-miR-19b-3p	2342	340	2770.19	2703.88	0.976063
hsa-miR-186-5p	1310	189	1549.51	1503.04	0.97001
hsa-miR-375	404	58	477.864	461.251	0.965234
hsa-miR-216b-5p	14	2	16.5597	15.9052	0.960479
hsa-miR-29b-2-5p	7	1	8.27983	7.9526	0.960479
hsa-miR-3180-5p	7	1	8.27983	7.9526	0.960479
hsa-miR-3180-5p	7	1	8.27983	7.9526	0.960479
hsa-miR-3180-5p	7	1	8.27983	7.9526	0.960479
hsa-miR-323a-3p	7	1	8.27983	7.9526	0.960479
hsa-miR-33a-3p	7	1	8.27983	7.9526	0.960479
hsa-miR-4686	7	1	8.27983	7.9526	0.960479
hsa-miR-548p	7	1	8.27983	7.9526	0.960479
hsa-miR-558	7	1	8.27983	7.9526	0.960479
hsa-miR-5585-5p	7	1	8.27983	7.9526	0.960479
hsa-miR-636	7	1	8.27983	7.9526	0.960479
hsa-miR-378i	35	5	41.3991	39.763	0.960479
hsa-miR-579-5p	21	3	24.8395	23.8578	0.960479
hsa-miR-708-3p	162	23	191.619	182.91	0.95455
hsa-miR-331-3p	360	51	425.82	405.583	0.952475
hsa-miR-27a-3p	2004	283	2370.4	2250.59	0.949456
hsa-miR-449c-5p	72	10	85.164	79.526	0.933799
hsa-miR-548b-5p	29	4	34.3022	31.8104	0.927359
hsa-miR-221-3p	9228	1269	10915.2	10091.9	0.92457
hsa-miR-4458	153	21	180.973	167.005	0.922813
hsa-miR-3074-5p	44	6	52.0446	47.7156	0.916821
hsa-miR-891a-5p	22	3	26.0223	23.8578	0.916821
hsa-miR-93-3p	142	19	167.962	151.099	0.899604
hsa-miR-151b	733	98	867.016	779.355	0.898893
hsa-let-7g-5p	570	76	674.215	604.398	0.896447
hsa-miR-5581-3p	15	2	17.7425	15.9052	0.896447
hsa-miR-31-3p	45	6	53.2275	47.7156	0.896447
hsa-miR-222-3p	7163	947	8472.63	7531.11	0.888875
hsa-miR-128-3p	2173	287	2570.3	2282.4	0.88799
hsa-miR-30a-3p	326	43	385.604	341.962	0.886823
hsa-miR-1273d	61	8	72.1528	63.6208	0.881751
hsa-miR-21-5p	15998	2094	18923	16652.7	0.880029
hsa-miR-1261	116	15	137.209	119.289	0.869399
hsa-miR-30e-5p	1315	170	1555.43	1351.94	0.869179
hsa-miR-4443	4442	573	5254.14	4556.84	0.867285
hsa-miR-501-5p	117	15	138.391	119.289	0.861968
hsa-miR-106b-5p	7795	994	9220.18	7904.89	0.857346
hsa-miR-1271-3p	127	16	150.22	127.242	0.847037
hsa-miR-942-5p	183	23	216.458	182.91	0.845012
hsa-miR-3174	16	2	18.9253	15.9052	0.840419
hsa-miR-3648	8	1	9.46266	7.9526	0.840419
hsa-miR-3648	8	1	9.46266	7.9526	0.840419
hsa-miR-3944-3p	16	2	18.9253	15.9052	0.840419
hsa-miR-4423-3p	8	1	9.46266	7.9526	0.840419
hsa-miR-548aa	16	2	18.9253	15.9052	0.840419
hsa-miR-548aa	16	2	18.9253	15.9052	0.840419
hsa-miR-548am-5p	8	1	9.46266	7.9526	0.840419
hsa-miR-548an	8	1	9.46266	7.9526	0.840419
hsa-miR-548au-5p	8	1	9.46266	7.9526	0.840419
hsa-miR-548k	16	2	18.9253	15.9052	0.840419
hsa-miR-548t-3p	16	2	18.9253	15.9052	0.840419
hsa-miR-664b-3p	8	1	9.46266	7.9526	0.840419
hsa-miR-718	8	1	9.46266	7.9526	0.840419
hsa-miR-500b-5p	80	10	94.6266	79.526	0.840419
hsa-miR-330-3p	450	56	532.275	445.346	0.836684
hsa-miR-17-3p	3078	378	3640.76	3006.08	0.825675
hsa-miR-128-3p	2846	348	3366.34	2767.51	0.822111
hsa-miR-296-5p	82	10	96.9923	79.526	0.819921
hsa-miR-338-3p	164	20	193.985	159.052	0.819921
hsa-miR-130b-5p	280	34	331.193	270.388	0.816407
hsa-miR-7-1-3p	83	10	98.1751	79.526	0.810043
hsa-miR-181c-3p	100	12	118.283	95.4312	0.806802
hsa-miR-19b-1-5p	50	6	59.1416	47.7156	0.806802
hsa-miR-581	25	3	29.5708	23.8578	0.806802
hsa-miR-6836-3p	25	3	29.5708	23.8578	0.806802
hsa-miR-219a-1-3p	42	5	49.679	39.763	0.800399
hsa-miR-326	42	5	49.679	39.763	0.800399
hsa-miR-32-5p	1083	128	1281.01	1017.93	0.794634
hsa-miR-346	17	2	20.1082	15.9052	0.790983
hsa-miR-4326	17	2	20.1082	15.9052	0.790983
hsa-miR-4474-3p	17	2	20.1082	15.9052	0.790983
hsa-miR-324-3p	85	10	100.541	79.526	0.790983
hsa-miR-378c	402	47	475.499	373.772	0.786064
hsa-miR-185-5p	489	57	578.405	453.298	0.783704
hsa-miR-193a-3p	215	25	254.309	198.815	0.781785
hsa-miR-582-5p	43	5	50.8618	39.763	0.781785
hsa-miR-129-5p	104	12	123.015	95.4312	0.775771
hsa-miR-129-5p	104	12	123.015	95.4312	0.775771
hsa-miR-3613-5p	61	7	72.1528	55.6682	0.771532
hsa-miR-9-5p	532	61	629.267	485.109	0.770911
hsa-miR-197-3p	875	99	1034.98	787.308	0.760699
hsa-miR-4532	62	7	73.3356	55.6682	0.759088
hsa-miR-424-3p	909	102	1075.2	811.165	0.754436
hsa-miR-92a-3p	46202	5183	54649.2	41218.3	0.754234
hsa-miR-130b-3p	1894	211	2240.29	1678	0.749011
hsa-miR-181d-5p	737	82	871.748	652.113	0.748053
hsa-miR-30d-3p	27	3	31.9365	23.8578	0.747039
hsa-miR-3179	27	3	31.9365	23.8578	0.747039
hsa-miR-3179	27	3	31.9365	23.8578	0.747039
hsa-miR-3179	27	3	31.9365	23.8578	0.747039
hsa-miR-3179	27	3	31.9365	23.8578	0.747039
hsa-miR-497-5p	45	5	53.2275	39.763	0.747039
hsa-miR-185-3p	9	1	10.6455	7.9526	0.747039
hsa-miR-2355-3p	9	1	10.6455	7.9526	0.747039
hsa-miR-26a-2-3p	9	1	10.6455	7.9526	0.747039
hsa-miR-3180-3p	9	1	10.6455	7.9526	0.747039
hsa-miR-3180	9	1	10.6455	7.9526	0.747039
hsa-miR-3180-3p	9	1	10.6455	7.9526	0.747039
hsa-miR-3180	9	1	10.6455	7.9526	0.747039
hsa-miR-3180-3p	9	1	10.6455	7.9526	0.747039
hsa-miR-3180	9	1	10.6455	7.9526	0.747039
hsa-miR-3180-3p	9	1	10.6455	7.9526	0.747039
hsa-miR-3180	9	1	10.6455	7.9526	0.747039
hsa-miR-3180-3p	9	1	10.6455	7.9526	0.747039
hsa-miR-3180	9	1	10.6455	7.9526	0.747039
hsa-miR-3687	18	2	21.291	15.9052	0.747039
hsa-miR-3687	18	2	21.291	15.9052	0.747039
hsa-miR-3909	9	1	10.6455	7.9526	0.747039
hsa-miR-548c-5p	9	1	10.6455	7.9526	0.747039
hsa-miR-548f-3p	9	1	10.6455	7.9526	0.747039
hsa-miR-548f-3p	9	1	10.6455	7.9526	0.747039
hsa-miR-548o-5p	9	1	10.6455	7.9526	0.747039
hsa-miR-92a-3p	47761	5305	56493.3	42188.6	0.746789
hsa-miR-20a-3p	301	33	356.033	262.436	0.737112
hsa-miR-625-5p	101	11	119.466	87.4786	0.732246
hsa-miR-29b-3p	1406	153	1663.06	1216.75	0.731631
hsa-miR-18a-5p	2116	230	2502.87	1829.1	0.730799
hsa-miR-935	157	17	185.705	135.194	0.728006
hsa-miR-192-5p	1090	117	1289.29	930.454	0.721681
hsa-miR-592	3873	414	4581.11	3292.38	0.718685
hsa-miR-29b-3p	1397	149	1652.42	1184.94	0.717093
hsa-miR-30b-5p	422	45	499.155	357.867	0.716945
hsa-miR-769-5p	347	37	410.443	294.246	0.716899
hsa-miR-32-3p	244	26	288.611	206.768	0.716423
hsa-miR-874-3p	169	18	199.899	143.147	0.716097
hsa-miR-99b-5p	2020	215	2389.32	1709.81	0.715604
hsa-miR-532-5p	3007	320	3556.78	2544.83	0.715488
hsa-miR-193a-5p	160	17	189.253	135.194	0.714356
hsa-miR-1180-3p	1450	154	1715.11	1224.7	0.714066
hsa-miR-194-5p	245	26	289.794	206.768	0.713499
hsa-miR-105-5p	38	4	44.9476	31.8104	0.707721
hsa-miR-105-5p	38	4	44.9476	31.8104	0.707721
hsa-miR-1284	19	2	22.4738	15.9052	0.707721
hsa-miR-195-5p	95	10	112.369	79.526	0.707721
hsa-miR-18a-3p	775	81	916.695	644.161	0.702699
hsa-miR-1292-5p	201	21	237.749	167.005	0.70244
hsa-miR-181b-5p	588	61	695.506	485.109	0.697491
hsa-miR-301a-3p	222	23	262.589	182.91	0.696564
hsa-miR-193b-3p	280	29	331.193	230.625	0.696347
hsa-miR-22-3p	3946	405	4667.46	3220.8	0.690055
hsa-miR-4677-3p	39	4	46.1305	31.8104	0.689575
hsa-miR-7976	39	4	46.1305	31.8104	0.689575
hsa-miR-590-3p	441	45	521.629	357.867	0.686056
hsa-miR-191-5p	2966	301	3508.28	2393.73	0.682309
hsa-miR-3176	69	7	81.6155	55.6682	0.682079
hsa-miR-424-5p	495	50	585.502	397.63	0.679127
hsa-miR-425-3p	218	22	257.858	174.957	0.678503
hsa-miR-129-2-3p	60	6	70.97	47.7156	0.672335
hsa-miR-3123	60	6	70.97	47.7156	0.672335
hsa-miR-3142	30	3	35.485	23.8578	0.672335
hsa-miR-3142	30	3	35.485	23.8578	0.672335
hsa-miR-3195	30	3	35.485	23.8578	0.672335
hsa-miR-1291	80	8	94.6266	63.6208	0.672335
hsa-miR-501-3p	40	4	47.3133	31.8104	0.672335
hsa-miR-500a-5p	201	20	237.749	159.052	0.66899
hsa-miR-374a-5p	1542	153	1823.93	1216.75	0.667103
hsa-miR-1303	213	21	251.943	167.005	0.662866
hsa-miR-548e-3p	224	22	264.955	174.957	0.660329
hsa-miR-194-5p	316	31	373.775	246.531	0.659569
hsa-miR-27b-3p	6635	650	7848.1	5169.19	0.658656
hsa-miR-99a-5p	7181	702	8493.92	5582.73	0.657261
hsa-miR-187-3p	195	19	230.652	151.099	0.655096
hsa-miR-3615	103	10	121.832	79.526	0.652753
hsa-miR-10a-3p	310	30	366.678	238.578	0.650647
hsa-miR-450a-5p	1087	105	1285.74	835.023	0.64945
hsa-miR-151a-5p	14996	1447	17737.8	11507.4	0.648752
hsa-miR-450a-5p	1095	105	1295.2	835.023	0.644705
hsa-miR-15a-5p	1472	141	1741.13	1121.32	0.644017
hsa-miR-24-3p	2558	245	3025.69	1948.39	0.643949
hsa-miR-331-5p	94	9	111.186	71.5734	0.643725
hsa-miR-24-3p	2562	244	3030.42	1940.44	0.640319
hsa-miR-423-3p	4117	392	4869.72	3117.42	0.640164
hsa-miR-196b-5p	2260	215	2673.2	1709.81	0.639611
hsa-miR-342-3p	894	85	1057.45	675.971	0.639245
hsa-miR-484	2160	205	2554.92	1630.28	0.638096
hsa-miR-3912-3p	53	5	62.6901	39.763	0.634279
hsa-miR-28-5p	615	58	727.442	461.251	0.634072
hsa-miR-421	1302	122	1540.05	970.218	0.629992
hsa-miR-1271-5p	139	13	164.414	103.384	0.628803
hsa-miR-34a-5p	696	65	823.252	516.919	0.627899
hsa-miR-589-5p	889	83	1051.54	660.066	0.627715
hsa-miR-17-5p	10512	977	12433.9	7769.69	0.624878
hsa-miR-93-5p	11756	1092	13905.4	8684.24	0.624524
hsa-miR-15b-3p	281	26	332.376	206.768	0.62209
hsa-miR-146b-5p	956	88	1130.79	699.829	0.618886
hsa-miR-181a-5p	1157	106	1368.54	842.976	0.615968
hsa-miR-181a-5p	1157	106	1368.54	842.976	0.615968
hsa-miR-26a-5p	3567	326	4219.16	2592.55	0.61447
hsa-miR-10b-5p	34060	3098	40287.3	24637.2	0.611537
hsa-miR-125b-2-3p	88	8	104.089	63.6208	0.611214
hsa-miR-1305	11	1	13.0112	7.9526	0.611214
hsa-miR-340-3p	11	1	13.0112	7.9526	0.611214
hsa-miR-34b-3p	11	1	13.0112	7.9526	0.611214
hsa-miR-373-3p	11	1	13.0112	7.9526	0.611214
hsa-miR-450b-5p	660	60	780.67	477.156	0.611214
hsa-miR-26a-5p	3575	325	4228.63	2584.6	0.611214
hsa-miR-361-3p	343	31	405.712	246.531	0.60765
hsa-miR-30a-5p	2152	194	2545.46	1542.8	0.606102
hsa-miR-4755-3p	467	42	552.383	334.009	0.60467
hsa-miR-132-3p	303	27	358.398	214.72	0.599111
hsa-miR-505-3p	202	18	238.932	143.147	0.599111
hsa-miR-34c-5p	135	12	159.682	95.4312	0.597631
hsa-miR-9-5p	531	47	628.084	373.772	0.595099
hsa-miR-1301-3p	260	23	307.537	182.91	0.594758
hsa-miR-28-3p	1414	125	1672.53	994.075	0.594356
hsa-miR-9-5p	532	47	629.267	373.772	0.59398
hsa-miR-20a-5p	7576	669	8961.14	5320.29	0.593707
hsa-miR-625-3p	68	6	80.4326	47.7156	0.593237
hsa-miR-181a-2-3p	669	59	791.315	469.204	0.592941
hsa-miR-140-3p	2144	188	2535.99	1495.09	0.589548
hsa-miR-361-5p	630	55	745.185	437.393	0.586959
hsa-miR-92b-3p	1020	89	1206.49	707.782	0.586645
hsa-miR-1973	23	2	27.2052	15.9052	0.584639
hsa-miR-337-3p	23	2	27.2052	15.9052	0.584639
hsa-miR-628-3p	184	16	217.641	127.242	0.584639
hsa-miR-30c-5p	3375	293	3992.06	2330.11	0.583687
hsa-miR-4521	2186	189	2585.67	1503.04	0.581296
hsa-miR-3200-3p	81	7	95.8095	55.6682	0.58103
hsa-miR-30c-5p	3369	291	3984.96	2314.21	0.580735
hsa-miR-10a-5p	105972	9102	125347	72384.6	0.577473
hsa-miR-454-5p	35	3	41.3991	23.8578	0.576287
hsa-miR-502-3p	82	7	96.9923	55.6682	0.573945
hsa-miR-95-3p	82	7	96.9923	55.6682	0.573945
hsa-miR-215-5p	188	16	222.373	127.242	0.5722
hsa-miR-210-3p	1254	106	1483.27	842.976	0.568322
hsa-miR-96-5p	1053	89	1245.52	707.782	0.568261
hsa-miR-3158-3p	71	6	83.9811	47.7156	0.568171
hsa-miR-3158-3p	71	6	83.9811	47.7156	0.568171
hsa-miR-1281	95	8	112.369	63.6208	0.566177
hsa-miR-26b-5p	2946	247	3484.63	1964.29	0.563703
hsa-miR-576-5p	72	6	85.164	47.7156	0.560279
hsa-miR-455-3p	325	27	384.421	214.72	0.558555
hsa-miR-374b-5p	679	56	803.143	445.346	0.554503
hsa-miR-339-5p	1094	90	1294.02	715.734	0.553109
hsa-miR-30e-3p	1120	92	1324.77	731.639	0.552275
hsa-miR-106b-3p	451	37	533.458	294.246	0.551583
hsa-miR-7-5p	5695	467	6736.23	3713.87	0.551327
hsa-miR-124-3p	61	5	72.1528	39.763	0.551094
hsa-miR-124-3p	61	5	72.1528	39.763	0.551094
hsa-miR-25-3p	38351	3142	45362.8	24987.1	0.550827
hsa-miR-7-5p	5689	465	6729.14	3697.96	0.549545
hsa-miR-766-3p	86	7	101.724	55.6682	0.54725
hsa-miR-378a-3p	5574	452	6593.11	3594.58	0.545202
hsa-miR-1276	37	3	43.7648	23.8578	0.545137
hsa-miR-7-5p	5925	479	7008.28	3809.3	0.543542
hsa-miR-23b-3p	1116	90	1320.04	715.734	0.542206
hsa-miR-4792	3237	261	3828.83	2075.63	0.542105
hsa-miR-30d-5p	10786	869	12758	6910.81	0.541683
hsa-miR-3607-5p	25	2	29.5708	15.9052	0.537868
hsa-miR-181a-3p	125	10	147.854	79.526	0.537868
hsa-miR-107	953	76	1127.24	604.398	0.536175
hsa-miR-148a-5p	1044	83	1234.88	660.066	0.534519
hsa-miR-362-5p	630	50	745.185	397.63	0.533599
hsa-miR-1306-3p	307	24	363.13	190.862	0.525604
hsa-miR-340-5p	6429	501	7604.43	3984.25	0.523938
hsa-miR-324-5p	475	37	561.846	294.246	0.523714
hsa-miR-4301	13	1	15.3768	7.9526	0.517181
hsa-miR-486-3p	13	1	15.3768	7.9526	0.517181
hsa-miR-486-3p	13	1	15.3768	7.9526	0.517181
hsa-miR-221-5p	198	15	234.201	119.289	0.509345
hsa-miR-3609	53	4	62.6901	31.8104	0.507423
hsa-miR-1260b	7491	565	8860.6	4493.22	0.507101
hsa-miR-4791	267	20	315.816	159.052	0.503622
hsa-miR-425-5p	4010	300	4743.16	2385.78	0.502994
hsa-miR-218-5p	22200	1657	26258.9	13177.5	0.501829
hsa-miR-4461	134	10	158.5	79.526	0.501743
hsa-miR-218-5p	21914	1635	25920.6	13002.5	0.501628
hsa-miR-491-5p	27	2	31.9365	15.9052	0.498026
hsa-miR-500a-3p	81	6	95.8095	47.7156	0.498026
hsa-miR-1249	68	5	80.4326	39.763	0.494364
hsa-miR-149-5p	599	44	708.517	349.915	0.493869
hsa-miR-660-5p	191	14	225.921	111.336	0.492811
hsa-miR-183-5p	672	49	794.864	389.678	0.490244
hsa-miR-339-3p	1015	74	1200.58	588.493	0.490175
hsa-miR-652-3p	1141	83	1349.61	660.066	0.489078
hsa-miR-147b	28	2	33.1193	15.9052	0.480239
hsa-miR-1910-5p	14	1	16.5597	7.9526	0.480239
hsa-miR-889-5p	14	1	16.5597	7.9526	0.480239
hsa-miR-769-3p	42	3	49.679	23.8578	0.480239
hsa-miR-892a	42	3	49.679	23.8578	0.480239
hsa-miR-328-3p	1917	136	2267.49	1081.55	0.476983
hsa-miR-7974	636	45	752.282	357.867	0.475709
hsa-miR-140-5p	413	29	488.51	230.625	0.4721
hsa-miR-148a-3p	35196	2461	41631	19571.4	0.470115
hsa-miR-6756-3p	43	3	50.8618	23.8578	0.469071
hsa-miR-1260a	6554	457	7752.29	3634.34	0.468809
hsa-miR-628-5p	58	4	68.6043	31.8104	0.46368
hsa-miR-99b-3p	612	42	723.894	334.009	0.461407
hsa-miR-15b-5p	1269	87	1501.01	691.876	0.460939
hsa-miR-31-5p	917	62	1084.66	493.061	0.454578
hsa-miR-16-5p	28924	1950	34212.3	15507.6	0.453275
hsa-miR-16-5p	28901	1947	34185.1	15483.7	0.452938
hsa-miR-182-5p	906	61	1071.65	485.109	0.452676
hsa-miR-362-3p	15	1	17.7425	7.9526	0.448224
hsa-miR-450a-1-3p	15	1	17.7425	7.9526	0.448224
hsa-miR-483-3p	15	1	17.7425	7.9526	0.448224
hsa-miR-5582-3p	30	2	35.485	15.9052	0.448224
hsa-miR-124-3p	61	4	72.1528	31.8104	0.440876
hsa-miR-338-5p	61	4	72.1528	31.8104	0.440876
hsa-miR-1307-3p	3540	230	4187.23	1829.1	0.436828
hsa-miR-619-5p	47	3	55.5931	23.8578	0.42915
hsa-miR-151a-3p	24443	1537	28912	12223.2	0.422771
hsa-miR-148b-3p	1419	88	1678.44	699.829	0.416952
hsa-miR-103a-3p	4560	277	5393.72	2202.87	0.408414
hsa-miR-454-3p	313	19	370.227	151.099	0.408127
hsa-miR-103a-3p	4687	284	5543.94	2258.54	0.407389
hsa-miR-941	2081	126	2461.48	1002.03	0.407084
hsa-miR-941	2081	126	2461.48	1002.03	0.407084
hsa-miR-941	2081	126	2461.48	1002.03	0.407084
hsa-miR-941	2081	126	2461.48	1002.03	0.407084
hsa-miR-941	2081	126	2461.48	1002.03	0.407084
hsa-miR-9-3p	667	40	788.95	318.104	0.4032
hsa-miR-9-3p	685	41	810.24	326.057	0.40242
hsa-miR-9-3p	685	41	810.24	326.057	0.40242
hsa-miR-1972	17	1	20.1082	7.9526	0.395491
hsa-miR-1972	17	1	20.1082	7.9526	0.395491
hsa-miR-2277-5p	17	1	20.1082	7.9526	0.395491
hsa-miR-6075	102	6	120.649	47.7156	0.395491
hsa-miR-4485	139	8	164.414	63.6208	0.386956
hsa-miR-942-3p	70	4	82.7983	31.8104	0.384192
hsa-miR-1304-3p	53	3	62.6901	23.8578	0.380567
hsa-miR-4322	250	14	295.708	111.336	0.376508
hsa-miR-29a-3p	646	36	764.11	286.294	0.374676
hsa-miR-190a-5p	18	1	21.291	7.9526	0.37352
hsa-miR-4473	144	8	170.328	63.6208	0.37352
hsa-miR-532-3p	73	4	86.3468	31.8104	0.368403
hsa-miR-1248	19	1	22.4738	7.9526	0.353861
hsa-miR-195-3p	135	7	159.682	55.6682	0.348618
hsa-miR-1285-3p	294	15	347.753	119.289	0.343028
hsa-miR-365a-3p	140	7	165.597	55.6682	0.336168
hsa-miR-365b-3p	140	7	165.597	55.6682	0.336168
hsa-miR-1285-3p	310	15	366.678	119.289	0.325324
hsa-miR-148b-5p	21	1	24.8395	7.9526	0.32016
hsa-miR-181c-5p	105	5	124.197	39.763	0.32016
hsa-miR-5701	43	2	50.8618	15.9052	0.312714
hsa-miR-5701	43	2	50.8618	15.9052	0.312714
hsa-miR-5701	43	2	50.8618	15.9052	0.312714
hsa-miR-1285-5p	22	1	26.0223	7.9526	0.305607
hsa-miR-940	132	6	156.134	47.7156	0.305607
hsa-miR-152-3p	199	9	235.384	71.5734	0.304071
hsa-miR-1269b	158	7	186.888	55.6682	0.29787
hsa-miR-708-5p	187	8	221.19	63.6208	0.28763
hsa-miR-196a-3p	48	2	56.776	15.9052	0.28014
hsa-miR-200b-3p	98	4	115.918	31.8104	0.274423
hsa-miR-7706	149	6	176.242	47.7156	0.270739
hsa-miR-7158-5p	25	1	29.5708	7.9526	0.268934
hsa-miR-503-5p	476	19	563.028	151.099	0.268369
hsa-miR-4284	484	19	572.491	151.099	0.263933
hsa-miR-330-5p	128	5	151.403	39.763	0.262631
hsa-miR-4484	232	9	274.417	71.5734	0.26082
hsa-miR-212-5p	26	1	30.7537	7.9526	0.25859
hsa-miR-744-3p	26	1	30.7537	7.9526	0.25859
hsa-miR-1278	53	2	62.6901	15.9052	0.253711
hsa-miR-6820-3p	656	23	775.938	182.91	0.235727
hsa-miR-6073	86	3	101.724	23.8578	0.234536
hsa-miR-6777-5p	1075	35	1271.55	278.341	0.2189
hsa-miR-4455	1120	36	1324.77	286.294	0.216108
hsa-miR-1296-5p	278	8	328.828	63.6208	0.193478
hsa-miR-921	35	1	41.3991	7.9526	0.192096
hsa-miR-4800-3p	176	5	208.179	39.763	0.191004
hsa-miR-4687-5p	38	1	44.9476	7.9526	0.17693
hsa-miR-624-5p	41	1	48.4961	7.9526	0.163984
hsa-miR-7110-3p	43	1	50.8618	7.9526	0.156357
hsa-miR-4785	125	2	147.854	15.9052	0.107574
hsa-miR-6892-3p	102	1	120.649	7.9526	0.0659152
hsa-let-7a-2-3p	0	0	0	0	#DIV/0!
hsa-let-7f-1-3p	0	0	0	0	#DIV/0!
hsa-miR-100-3p	0	0	0	0	#DIV/0!
hsa-miR-103b	0	0	0	0	#DIV/0!
hsa-miR-103b	0	0	0	0	#DIV/0!
hsa-miR-106a-3p	0	10	0	79.526	#DIV/0!
hsa-miR-1178-5p	0	0	0	0	#DIV/0!
hsa-miR-1178-3p	0	0	0	0	#DIV/0!
hsa-miR-1184	0	1	0	7.9526	#DIV/0!
hsa-miR-1184	0	1	0	7.9526	#DIV/0!
hsa-miR-1184	0	1	0	7.9526	#DIV/0!
hsa-miR-1185-5p	0	3	0	23.8578	#DIV/0!
hsa-miR-1185-5p	0	3	0	23.8578	#DIV/0!
hsa-miR-1199-5p	0	1	0	7.9526	#DIV/0!
hsa-miR-1199-3p	0	0	0	0	#DIV/0!
hsa-miR-1200	0	0	0	0	#DIV/0!
hsa-miR-1202	0	1	0	7.9526	#DIV/0!
hsa-miR-1203	0	0	0	0	#DIV/0!
hsa-miR-1205	0	0	0	0	#DIV/0!
hsa-miR-1206	0	3	0	23.8578	#DIV/0!
hsa-miR-1207-3p	0	0	0	0	#DIV/0!
hsa-miR-1208	0	0	0	0	#DIV/0!
hsa-miR-122-3p	0	1	0	7.9526	#DIV/0!
hsa-miR-1225-5p	0	2	0	15.9052	#DIV/0!
hsa-miR-1225-3p	0	0	0	0	#DIV/0!
hsa-miR-1227-5p	0	0	0	0	#DIV/0!
hsa-miR-1227-3p	0	1	0	7.9526	#DIV/0!
hsa-miR-1228-3p	0	0	0	0	#DIV/0!
hsa-miR-1231	0	0	0	0	#DIV/0!
hsa-miR-1234-3p	0	0	0	0	#DIV/0!
hsa-miR-1236-5p	0	1	0	7.9526	#DIV/0!
hsa-miR-1237-3p	0	0	0	0	#DIV/0!
hsa-miR-1238-3p	0	1	0	7.9526	#DIV/0!
hsa-miR-1245b-5p	0	2	0	15.9052	#DIV/0!
hsa-miR-1245b-3p	0	0	0	0	#DIV/0!
hsa-miR-1250-3p	0	0	0	0	#DIV/0!
hsa-miR-1251-5p	0	0	0	0	#DIV/0!
hsa-miR-1251-3p	0	0	0	0	#DIV/0!
hsa-miR-1252-5p	0	0	0	0	#DIV/0!
hsa-miR-1252-3p	0	0	0	0	#DIV/0!
hsa-miR-1255b-2-3p	0	0	0	0	#DIV/0!
hsa-miR-1258	0	1	0	7.9526	#DIV/0!
hsa-miR-1263	0	1	0	7.9526	#DIV/0!
hsa-miR-1265	0	1	0	7.9526	#DIV/0!
hsa-miR-1266-3p	0	5	0	39.763	#DIV/0!
hsa-miR-1267	0	0	0	0	#DIV/0!
hsa-miR-1270	0	6	0	47.7156	#DIV/0!
hsa-miR-1279	0	0	0	0	#DIV/0!
hsa-miR-128-2-5p	0	0	0	0	#DIV/0!
hsa-miR-1282	0	0	0	0	#DIV/0!
hsa-miR-1283	0	0	0	0	#DIV/0!
hsa-miR-1283	0	0	0	0	#DIV/0!
hsa-miR-1287-3p	0	1	0	7.9526	#DIV/0!
hsa-miR-1288-5p	0	1	0	7.9526	#DIV/0!
hsa-miR-1289	0	0	0	0	#DIV/0!
hsa-miR-1289	0	0	0	0	#DIV/0!
hsa-miR-1295b-5p	0	0	0	0	#DIV/0!
hsa-miR-1295b-3p	0	0	0	0	#DIV/0!
hsa-miR-1297	0	1	0	7.9526	#DIV/0!
hsa-miR-1298-3p	0	0	0	0	#DIV/0!
hsa-miR-1301-5p	0	0	0	0	#DIV/0!
hsa-miR-1323	0	0	0	0	#DIV/0!
hsa-miR-1324	0	0	0	0	#DIV/0!
hsa-miR-133b	0	1	0	7.9526	#DIV/0!
hsa-miR-134-3p	0	1	0	7.9526	#DIV/0!
hsa-miR-135a-3p	0	0	0	0	#DIV/0!
hsa-miR-136-3p	0	1	0	7.9526	#DIV/0!
hsa-miR-137	0	0	0	0	#DIV/0!
hsa-miR-138-1-3p	0	1	0	7.9526	#DIV/0!
hsa-miR-141-5p	0	0	0	0	#DIV/0!
hsa-miR-143-5p	0	0	0	0	#DIV/0!
hsa-miR-145-5p	0	3	0	23.8578	#DIV/0!
hsa-miR-1468-3p	0	0	0	0	#DIV/0!
hsa-miR-146a-3p	0	0	0	0	#DIV/0!
hsa-miR-146b-3p	0	1	0	7.9526	#DIV/0!
hsa-miR-1470	0	1	0	7.9526	#DIV/0!
hsa-miR-1537-5p	0	0	0	0	#DIV/0!
hsa-miR-1537-3p	0	1	0	7.9526	#DIV/0!
hsa-miR-1538	0	1	0	7.9526	#DIV/0!
hsa-miR-1539	0	0	0	0	#DIV/0!
hsa-miR-154-3p	0	0	0	0	#DIV/0!
hsa-miR-155-5p	0	58	0	461.251	#DIV/0!
hsa-miR-155-3p	0	0	0	0	#DIV/0!
hsa-miR-1587	0	1	0	7.9526	#DIV/0!
hsa-miR-181d-3p	0	3	0	23.8578	#DIV/0!
hsa-miR-1825	0	1	0	7.9526	#DIV/0!
hsa-miR-18b-3p	0	1	0	7.9526	#DIV/0!
hsa-miR-1909-5p	0	0	0	0	#DIV/0!
hsa-miR-190a-3p	0	0	0	0	#DIV/0!
hsa-miR-1911-5p	0	1	0	7.9526	#DIV/0!
hsa-miR-1912	0	0	0	0	#DIV/0!
hsa-miR-1914-3p	0	4	0	31.8104	#DIV/0!
hsa-miR-1915-5p	0	0	0	0	#DIV/0!
hsa-miR-192-3p	0	1	0	7.9526	#DIV/0!
hsa-miR-198	0	0	0	0	#DIV/0!
hsa-miR-19b-2-5p	0	1	0	7.9526	#DIV/0!
hsa-miR-200b-5p	0	1	0	7.9526	#DIV/0!
hsa-miR-200c-5p	0	2	0	15.9052	#DIV/0!
hsa-miR-202-5p	0	1	0	7.9526	#DIV/0!
hsa-miR-203b-5p	0	0	0	0	#DIV/0!
hsa-miR-203b-3p	0	0	0	0	#DIV/0!
hsa-miR-2052	0	0	0	0	#DIV/0!
hsa-miR-2053	0	0	0	0	#DIV/0!
hsa-miR-2054	0	0	0	0	#DIV/0!
hsa-miR-208a-5p	0	0	0	0	#DIV/0!
hsa-miR-208b-5p	0	0	0	0	#DIV/0!
hsa-miR-20b-3p	0	1	0	7.9526	#DIV/0!
hsa-miR-211-5p	0	0	0	0	#DIV/0!
hsa-miR-211-3p	0	1	0	7.9526	#DIV/0!
hsa-miR-2114-3p	0	1	0	7.9526	#DIV/0!
hsa-miR-2116-5p	0	0	0	0	#DIV/0!
hsa-miR-2117	0	3	0	23.8578	#DIV/0!
hsa-miR-214-5p	0	0	0	0	#DIV/0!
hsa-miR-216b-3p	0	0	0	0	#DIV/0!
hsa-miR-219a-5p	0	0	0	0	#DIV/0!
hsa-miR-219a-2-3p	0	1	0	7.9526	#DIV/0!
hsa-miR-219b-5p	0	3	0	23.8578	#DIV/0!
hsa-miR-219b-3p	0	0	0	0	#DIV/0!
hsa-miR-223-5p	0	4	0	31.8104	#DIV/0!
hsa-miR-223-3p	0	70	0	556.682	#DIV/0!
hsa-miR-224-3p	0	0	0	0	#DIV/0!
hsa-miR-2276-5p	0	21	0	167.005	#DIV/0!
hsa-miR-23a-5p	0	14	0	111.336	#DIV/0!
hsa-miR-23c	0	0	0	0	#DIV/0!
hsa-miR-2467-5p	0	0	0	0	#DIV/0!
hsa-miR-2467-3p	0	2	0	15.9052	#DIV/0!
hsa-miR-2681-3p	0	1	0	7.9526	#DIV/0!
hsa-miR-2682-3p	0	1	0	7.9526	#DIV/0!
hsa-miR-2909	0	0	0	0	#DIV/0!
hsa-miR-297	0	1	0	7.9526	#DIV/0!
hsa-miR-298	0	1	0	7.9526	#DIV/0!
hsa-miR-299-3p	0	2	0	15.9052	#DIV/0!
hsa-miR-300	0	1	0	7.9526	#DIV/0!
hsa-miR-302b-5p	0	1	0	7.9526	#DIV/0!
hsa-miR-302b-3p	0	0	0	0	#DIV/0!
hsa-miR-302c-5p	0	5	0	39.763	#DIV/0!
hsa-miR-302d-5p	0	0	0	0	#DIV/0!
hsa-miR-302d-3p	0	0	0	0	#DIV/0!
hsa-miR-302f	0	0	0	0	#DIV/0!
hsa-miR-3117-5p	0	0	0	0	#DIV/0!
hsa-miR-3117-3p	0	0	0	0	#DIV/0!
hsa-miR-3118	0	0	0	0	#DIV/0!
hsa-miR-3118	0	0	0	0	#DIV/0!
hsa-miR-3118	0	0	0	0	#DIV/0!
hsa-miR-3118	0	0	0	0	#DIV/0!
hsa-miR-3119	0	1	0	7.9526	#DIV/0!
hsa-miR-3119	0	1	0	7.9526	#DIV/0!
hsa-miR-3121-5p	0	1	0	7.9526	#DIV/0!
hsa-miR-3124-3p	0	1	0	7.9526	#DIV/0!
hsa-miR-3127-3p	0	1	0	7.9526	#DIV/0!
hsa-miR-3129-5p	0	4	0	31.8104	#DIV/0!
hsa-miR-3129-3p	0	1	0	7.9526	#DIV/0!
hsa-miR-3132	0	3	0	23.8578	#DIV/0!
hsa-miR-3133	0	4	0	31.8104	#DIV/0!
hsa-miR-3134	0	3	0	23.8578	#DIV/0!
hsa-miR-3136-3p	0	0	0	0	#DIV/0!
hsa-miR-3137	0	0	0	0	#DIV/0!
hsa-miR-3140-5p	0	0	0	0	#DIV/0!
hsa-miR-3140-3p	0	0	0	0	#DIV/0!
hsa-miR-3147	0	7	0	55.6682	#DIV/0!
hsa-miR-3150b-3p	0	1	0	7.9526	#DIV/0!
hsa-miR-3151-5p	0	4	0	31.8104	#DIV/0!
hsa-miR-3151-3p	0	0	0	0	#DIV/0!
hsa-miR-3152-5p	0	1	0	7.9526	#DIV/0!
hsa-miR-3152-3p	0	191	0	1518.95	#DIV/0!
hsa-miR-3154	0	4	0	31.8104	#DIV/0!
hsa-miR-3156-3p	0	0	0	0	#DIV/0!
hsa-miR-3156-3p	0	0	0	0	#DIV/0!
hsa-miR-3158-5p	0	0	0	0	#DIV/0!
hsa-miR-3162-5p	0	3	0	23.8578	#DIV/0!
hsa-miR-3163	0	0	0	0	#DIV/0!
hsa-miR-3166	0	0	0	0	#DIV/0!
hsa-miR-3167	0	0	0	0	#DIV/0!
hsa-miR-3183	0	0	0	0	#DIV/0!
hsa-miR-3184-5p	0	1	0	7.9526	#DIV/0!
hsa-miR-3185	0	1	0	7.9526	#DIV/0!
hsa-miR-3186-3p	0	1	0	7.9526	#DIV/0!
hsa-miR-3189-5p	0	0	0	0	#DIV/0!
hsa-miR-3189-3p	0	3	0	23.8578	#DIV/0!
hsa-miR-3190-5p	0	0	0	0	#DIV/0!
hsa-miR-3191-5p	0	0	0	0	#DIV/0!
hsa-miR-3192-3p	0	0	0	0	#DIV/0!
hsa-miR-3194-5p	0	0	0	0	#DIV/0!
hsa-miR-3197	0	4	0	31.8104	#DIV/0!
hsa-miR-3198	0	2	0	15.9052	#DIV/0!
hsa-miR-3198	0	2	0	15.9052	#DIV/0!
hsa-miR-3199	0	2	0	15.9052	#DIV/0!
hsa-miR-3199	0	2	0	15.9052	#DIV/0!
hsa-miR-323a-5p	0	0	0	0	#DIV/0!
hsa-miR-323b-5p	0	0	0	0	#DIV/0!
hsa-miR-323b-3p	0	0	0	0	#DIV/0!
hsa-miR-325	0	0	0	0	#DIV/0!
hsa-miR-329-5p	0	5	0	39.763	#DIV/0!
hsa-miR-329-5p	0	5	0	39.763	#DIV/0!
hsa-miR-337-5p	0	0	0	0	#DIV/0!
hsa-miR-3529-3p	0	0	0	0	#DIV/0!
hsa-miR-3591-5p	0	1	0	7.9526	#DIV/0!
hsa-miR-3591-3p	0	0	0	0	#DIV/0!
hsa-miR-3606-5p	0	1	0	7.9526	#DIV/0!
hsa-miR-3606-3p	0	1	0	7.9526	#DIV/0!
hsa-miR-3610	0	3	0	23.8578	#DIV/0!
hsa-miR-3612	0	7	0	55.6682	#DIV/0!
hsa-miR-3616-3p	0	0	0	0	#DIV/0!
hsa-miR-3618	0	0	0	0	#DIV/0!
hsa-miR-3619-3p	0	1	0	7.9526	#DIV/0!
hsa-miR-3620-3p	0	0	0	0	#DIV/0!
hsa-miR-3621	0	1	0	7.9526	#DIV/0!
hsa-miR-3622a-3p	0	0	0	0	#DIV/0!
hsa-miR-363-5p	0	1	0	7.9526	#DIV/0!
hsa-miR-363-3p	0	5	0	39.763	#DIV/0!
hsa-miR-3646	0	0	0	0	#DIV/0!
hsa-miR-3649	0	8	0	63.6208	#DIV/0!
hsa-miR-3650	0	0	0	0	#DIV/0!
hsa-miR-3655	0	0	0	0	#DIV/0!
hsa-miR-3657	0	0	0	0	#DIV/0!
hsa-miR-3663-5p	0	5	0	39.763	#DIV/0!
hsa-miR-3664-5p	0	0	0	0	#DIV/0!
hsa-miR-3666	0	0	0	0	#DIV/0!
hsa-miR-3667-3p	0	0	0	0	#DIV/0!
hsa-miR-367-5p	0	1	0	7.9526	#DIV/0!
hsa-miR-367-3p	0	0	0	0	#DIV/0!
hsa-miR-3672	0	0	0	0	#DIV/0!
hsa-miR-3674	0	1	0	7.9526	#DIV/0!
hsa-miR-3675-5p	0	2	0	15.9052	#DIV/0!
hsa-miR-3675-3p	0	5	0	39.763	#DIV/0!
hsa-miR-3678-5p	0	0	0	0	#DIV/0!
hsa-miR-3678-3p	0	1	0	7.9526	#DIV/0!
hsa-miR-3680-3p	0	0	0	0	#DIV/0!
hsa-miR-3680-3p	0	0	0	0	#DIV/0!
hsa-miR-3681-3p	0	0	0	0	#DIV/0!
hsa-miR-3682-5p	0	0	0	0	#DIV/0!
hsa-miR-3682-3p	0	1	0	7.9526	#DIV/0!
hsa-miR-3683	0	2	0	15.9052	#DIV/0!
hsa-miR-3686	0	4	0	31.8104	#DIV/0!
hsa-miR-3688-5p	0	0	0	0	#DIV/0!
hsa-miR-3688-3p	0	1	0	7.9526	#DIV/0!
hsa-miR-3688-5p	0	0	0	0	#DIV/0!
hsa-miR-3688-3p	0	1	0	7.9526	#DIV/0!
hsa-miR-3689a-3p	0	0	0	0	#DIV/0!
hsa-miR-3689b-3p	0	1	0	7.9526	#DIV/0!
hsa-miR-3689c	0	1	0	7.9526	#DIV/0!
hsa-miR-3689d	0	1	0	7.9526	#DIV/0!
hsa-miR-3689d	0	1	0	7.9526	#DIV/0!
hsa-miR-3689f	0	3	0	23.8578	#DIV/0!
hsa-miR-369-5p	0	2	0	15.9052	#DIV/0!
hsa-miR-3692-3p	0	2	0	15.9052	#DIV/0!
hsa-miR-370-3p	0	6	0	47.7156	#DIV/0!
hsa-miR-3713	0	0	0	0	#DIV/0!
hsa-miR-3714	0	1	0	7.9526	#DIV/0!
hsa-miR-371a-5p	0	2	0	15.9052	#DIV/0!
hsa-miR-371b-5p	0	0	0	0	#DIV/0!
hsa-miR-371b-3p	0	0	0	0	#DIV/0!
hsa-miR-372-5p	0	1	0	7.9526	#DIV/0!
hsa-miR-373-5p	0	1	0	7.9526	#DIV/0!
hsa-miR-374c-3p	0	0	0	0	#DIV/0!
hsa-miR-376a-2-5p	0	0	0	0	#DIV/0!
hsa-miR-376b-5p	0	0	0	0	#DIV/0!
hsa-miR-376c-5p	0	1	0	7.9526	#DIV/0!
hsa-miR-376c-3p	0	5	0	39.763	#DIV/0!
hsa-miR-377-5p	0	0	0	0	#DIV/0!
hsa-miR-377-3p	0	2	0	15.9052	#DIV/0!
hsa-miR-378j	0	0	0	0	#DIV/0!
hsa-miR-380-5p	0	0	0	0	#DIV/0!
hsa-miR-381-5p	0	1	0	7.9526	#DIV/0!
hsa-miR-382-3p	0	1	0	7.9526	#DIV/0!
hsa-miR-383-3p	0	2	0	15.9052	#DIV/0!
hsa-miR-384	0	0	0	0	#DIV/0!
hsa-miR-3912-5p	0	0	0	0	#DIV/0!
hsa-miR-3913-3p	0	0	0	0	#DIV/0!
hsa-miR-3913-3p	0	0	0	0	#DIV/0!
hsa-miR-3914	0	2	0	15.9052	#DIV/0!
hsa-miR-3914	0	4	0	31.8104	#DIV/0!
hsa-miR-3915	0	2	0	15.9052	#DIV/0!
hsa-miR-3918	0	0	0	0	#DIV/0!
hsa-miR-3920	0	0	0	0	#DIV/0!
hsa-miR-3921	0	3	0	23.8578	#DIV/0!
hsa-miR-3922-3p	0	0	0	0	#DIV/0!
hsa-miR-3923	0	2	0	15.9052	#DIV/0!
hsa-miR-3924	0	0	0	0	#DIV/0!
hsa-miR-3925-3p	0	0	0	0	#DIV/0!
hsa-miR-3926	0	1	0	7.9526	#DIV/0!
hsa-miR-3926	0	1	0	7.9526	#DIV/0!
hsa-miR-3927-5p	0	0	0	0	#DIV/0!
hsa-miR-3927-3p	0	6	0	47.7156	#DIV/0!
hsa-miR-3929	0	4	0	31.8104	#DIV/0!
hsa-miR-3934-3p	0	0	0	0	#DIV/0!
hsa-miR-3935	0	0	0	0	#DIV/0!
hsa-miR-3937	0	1	0	7.9526	#DIV/0!
hsa-miR-3942-3p	0	1	0	7.9526	#DIV/0!
hsa-miR-3945	0	9	0	71.5734	#DIV/0!
hsa-miR-3972	0	0	0	0	#DIV/0!
hsa-miR-3973	0	0	0	0	#DIV/0!
hsa-miR-3975	0	0	0	0	#DIV/0!
hsa-miR-3978	0	1	0	7.9526	#DIV/0!
hsa-miR-409-5p	0	2	0	15.9052	#DIV/0!
hsa-miR-412-3p	0	1	0	7.9526	#DIV/0!
hsa-miR-4252	0	3	0	23.8578	#DIV/0!
hsa-miR-4253	0	0	0	0	#DIV/0!
hsa-miR-4255	0	3	0	23.8578	#DIV/0!
hsa-miR-4256	0	0	0	0	#DIV/0!
hsa-miR-4258	0	0	0	0	#DIV/0!
hsa-miR-4260	0	0	0	0	#DIV/0!
hsa-miR-4261	0	5	0	39.763	#DIV/0!
hsa-miR-4262	0	3	0	23.8578	#DIV/0!
hsa-miR-4263	0	1	0	7.9526	#DIV/0!
hsa-miR-4264	0	0	0	0	#DIV/0!
hsa-miR-4266	0	1	0	7.9526	#DIV/0!
hsa-miR-4267	0	0	0	0	#DIV/0!
hsa-miR-4269	0	0	0	0	#DIV/0!
hsa-miR-4270	0	0	0	0	#DIV/0!
hsa-miR-4272	0	3	0	23.8578	#DIV/0!
hsa-miR-4273	0	22	0	174.957	#DIV/0!
hsa-miR-4274	0	0	0	0	#DIV/0!
hsa-miR-4275	0	0	0	0	#DIV/0!
hsa-miR-4276	0	0	0	0	#DIV/0!
hsa-miR-4277	0	0	0	0	#DIV/0!
hsa-miR-4278	0	0	0	0	#DIV/0!
hsa-miR-4279	0	0	0	0	#DIV/0!
hsa-miR-4281	0	1	0	7.9526	#DIV/0!
hsa-miR-4282	0	0	0	0	#DIV/0!
hsa-miR-4283	0	0	0	0	#DIV/0!
hsa-miR-4283	0	0	0	0	#DIV/0!
hsa-miR-4287	0	0	0	0	#DIV/0!
hsa-miR-4288	0	2	0	15.9052	#DIV/0!
hsa-miR-4289	0	1	0	7.9526	#DIV/0!
hsa-miR-4290	0	0	0	0	#DIV/0!
hsa-miR-4292	0	0	0	0	#DIV/0!
hsa-miR-4293	0	0	0	0	#DIV/0!
hsa-miR-4294	0	1	0	7.9526	#DIV/0!
hsa-miR-4295	0	0	0	0	#DIV/0!
hsa-miR-4296	0	2	0	15.9052	#DIV/0!
hsa-miR-4297	0	0	0	0	#DIV/0!
hsa-miR-4298	0	8	0	63.6208	#DIV/0!
hsa-miR-4300	0	2	0	15.9052	#DIV/0!
hsa-miR-4304	0	0	0	0	#DIV/0!
hsa-miR-4305	0	1	0	7.9526	#DIV/0!
hsa-miR-4307	0	0	0	0	#DIV/0!
hsa-miR-4308	0	0	0	0	#DIV/0!
hsa-miR-4312	0	0	0	0	#DIV/0!
hsa-miR-4314	0	1	0	7.9526	#DIV/0!
hsa-miR-4315	0	0	0	0	#DIV/0!
hsa-miR-4315	0	0	0	0	#DIV/0!
hsa-miR-4316	0	8	0	63.6208	#DIV/0!
hsa-miR-4317	0	0	0	0	#DIV/0!
hsa-miR-4318	0	0	0	0	#DIV/0!
hsa-miR-4319	0	0	0	0	#DIV/0!
hsa-miR-432-3p	0	3	0	23.8578	#DIV/0!
hsa-miR-4320	0	1	0	7.9526	#DIV/0!
hsa-miR-4323	0	0	0	0	#DIV/0!
hsa-miR-4324	0	1	0	7.9526	#DIV/0!
hsa-miR-4325	0	0	0	0	#DIV/0!
hsa-miR-4327	0	6	0	47.7156	#DIV/0!
hsa-miR-4328	0	0	0	0	#DIV/0!
hsa-miR-4329	0	1	0	7.9526	#DIV/0!
hsa-miR-433-5p	0	1	0	7.9526	#DIV/0!
hsa-miR-4420	0	0	0	0	#DIV/0!
hsa-miR-4425	0	19	0	151.099	#DIV/0!
hsa-miR-4427	0	0	0	0	#DIV/0!
hsa-miR-4430	0	0	0	0	#DIV/0!
hsa-miR-4432	0	0	0	0	#DIV/0!
hsa-miR-4433b-5p	0	0	0	0	#DIV/0!
hsa-miR-4434	0	3	0	23.8578	#DIV/0!
hsa-miR-4435	0	0	0	0	#DIV/0!
hsa-miR-4435	0	0	0	0	#DIV/0!
hsa-miR-4436b-5p	0	2	0	15.9052	#DIV/0!
hsa-miR-4436b-3p	0	6	0	47.7156	#DIV/0!
hsa-miR-4436b-5p	0	2	0	15.9052	#DIV/0!
hsa-miR-4436b-3p	0	6	0	47.7156	#DIV/0!
hsa-miR-4437	0	0	0	0	#DIV/0!
hsa-miR-4439	0	1	0	7.9526	#DIV/0!
hsa-miR-4441	0	0	0	0	#DIV/0!
hsa-miR-4442	0	7	0	55.6682	#DIV/0!
hsa-miR-4445-5p	0	0	0	0	#DIV/0!
hsa-miR-4445-3p	0	1	0	7.9526	#DIV/0!
hsa-miR-4446-5p	0	0	0	0	#DIV/0!
hsa-miR-4452	0	0	0	0	#DIV/0!
hsa-miR-4453	0	1	0	7.9526	#DIV/0!
hsa-miR-4460	0	5	0	39.763	#DIV/0!
hsa-miR-4464	0	0	0	0	#DIV/0!
hsa-miR-4468	0	1	0	7.9526	#DIV/0!
hsa-miR-4469	0	1	0	7.9526	#DIV/0!
hsa-miR-4471	0	1	0	7.9526	#DIV/0!
hsa-miR-4474-5p	0	15	0	119.289	#DIV/0!
hsa-miR-4475	0	1	0	7.9526	#DIV/0!
hsa-miR-4476	0	2	0	15.9052	#DIV/0!
hsa-miR-4479	0	0	0	0	#DIV/0!
hsa-miR-448	0	0	0	0	#DIV/0!
hsa-miR-4481	0	4	0	31.8104	#DIV/0!
hsa-miR-4486	0	2	0	15.9052	#DIV/0!
hsa-miR-4489	0	2	0	15.9052	#DIV/0!
hsa-miR-4490	0	2	0	15.9052	#DIV/0!
hsa-miR-4491	0	0	0	0	#DIV/0!
hsa-miR-4493	0	0	0	0	#DIV/0!
hsa-miR-4495	0	0	0	0	#DIV/0!
hsa-miR-4499	0	1	0	7.9526	#DIV/0!
hsa-miR-449c-3p	0	0	0	0	#DIV/0!
hsa-miR-4500	0	7	0	55.6682	#DIV/0!
hsa-miR-4503	0	0	0	0	#DIV/0!
hsa-miR-4506	0	0	0	0	#DIV/0!
hsa-miR-4507	0	0	0	0	#DIV/0!
hsa-miR-4509	0	0	0	0	#DIV/0!
hsa-miR-4509	0	0	0	0	#DIV/0!
hsa-miR-4509	0	0	0	0	#DIV/0!
hsa-miR-4510	0	4	0	31.8104	#DIV/0!
hsa-miR-4513	0	4	0	31.8104	#DIV/0!
hsa-miR-4514	0	12	0	95.4312	#DIV/0!
hsa-miR-4518	0	2	0	15.9052	#DIV/0!
hsa-miR-4519	0	1	0	7.9526	#DIV/0!
hsa-miR-451b	0	1	0	7.9526	#DIV/0!
hsa-miR-452-3p	0	2	0	15.9052	#DIV/0!
hsa-miR-4520a-5p	0	1	0	7.9526	#DIV/0!
hsa-miR-4520b-5p	0	1	0	7.9526	#DIV/0!
hsa-miR-4520a-5p	0	1	0	7.9526	#DIV/0!
hsa-miR-4520b-5p	0	1	0	7.9526	#DIV/0!
hsa-miR-4522	0	0	0	0	#DIV/0!
hsa-miR-4523	0	1	0	7.9526	#DIV/0!
hsa-miR-4524a-5p	0	0	0	0	#DIV/0!
hsa-miR-4524b-5p	0	0	0	0	#DIV/0!
hsa-miR-4524b-3p	0	3	0	23.8578	#DIV/0!
hsa-miR-4525	0	0	0	0	#DIV/0!
hsa-miR-4528	0	1	0	7.9526	#DIV/0!
hsa-miR-4529-5p	0	0	0	0	#DIV/0!
hsa-miR-4529-3p	0	1	0	7.9526	#DIV/0!
hsa-miR-4530	0	11	0	87.4786	#DIV/0!
hsa-miR-4533	0	4	0	31.8104	#DIV/0!
hsa-miR-4534	0	8	0	63.6208	#DIV/0!
hsa-miR-4536-5p	0	0	0	0	#DIV/0!
hsa-miR-4536-3p	0	0	0	0	#DIV/0!
hsa-miR-4536-5p	0	0	0	0	#DIV/0!
hsa-miR-4536-3p	0	0	0	0	#DIV/0!
hsa-miR-4537	0	0	0	0	#DIV/0!
hsa-miR-4539	0	4	0	31.8104	#DIV/0!
hsa-miR-4540	0	0	0	0	#DIV/0!
hsa-miR-4632-3p	0	0	0	0	#DIV/0!
hsa-miR-4633-5p	0	0	0	0	#DIV/0!
hsa-miR-4633-3p	0	0	0	0	#DIV/0!
hsa-miR-4635	0	1	0	7.9526	#DIV/0!
hsa-miR-4636	0	0	0	0	#DIV/0!
hsa-miR-4637	0	0	0	0	#DIV/0!
hsa-miR-4638-5p	0	1	0	7.9526	#DIV/0!
hsa-miR-4638-3p	0	1	0	7.9526	#DIV/0!
hsa-miR-4639-3p	0	0	0	0	#DIV/0!
hsa-miR-4640-5p	0	0	0	0	#DIV/0!
hsa-miR-4640-3p	0	0	0	0	#DIV/0!
hsa-miR-4641	0	0	0	0	#DIV/0!
hsa-miR-4642	0	0	0	0	#DIV/0!
hsa-miR-4643	0	0	0	0	#DIV/0!
hsa-miR-4645-5p	0	0	0	0	#DIV/0!
hsa-miR-4645-3p	0	0	0	0	#DIV/0!
hsa-miR-4648	0	2	0	15.9052	#DIV/0!
hsa-miR-4651	0	3	0	23.8578	#DIV/0!
hsa-miR-4652-3p	0	0	0	0	#DIV/0!
hsa-miR-4653-5p	0	1	0	7.9526	#DIV/0!
hsa-miR-4653-3p	0	1	0	7.9526	#DIV/0!
hsa-miR-4654	0	35	0	278.341	#DIV/0!
hsa-miR-4655-5p	0	1	0	7.9526	#DIV/0!
hsa-miR-4656	0	1	0	7.9526	#DIV/0!
hsa-miR-4657	0	0	0	0	#DIV/0!
hsa-miR-4659a-5p	0	0	0	0	#DIV/0!
hsa-miR-4659b-5p	0	0	0	0	#DIV/0!
hsa-miR-4659b-3p	0	4	0	31.8104	#DIV/0!
hsa-miR-466	0	0	0	0	#DIV/0!
hsa-miR-4661-3p	0	2	0	15.9052	#DIV/0!
hsa-miR-4662a-3p	0	1	0	7.9526	#DIV/0!
hsa-miR-4665-3p	0	1	0	7.9526	#DIV/0!
hsa-miR-4666a-5p	0	1	0	7.9526	#DIV/0!
hsa-miR-4666a-3p	0	1	0	7.9526	#DIV/0!
hsa-miR-4667-3p	0	0	0	0	#DIV/0!
hsa-miR-4668-3p	0	0	0	0	#DIV/0!
hsa-miR-4670-5p	0	0	0	0	#DIV/0!
hsa-miR-4670-3p	0	0	0	0	#DIV/0!
hsa-miR-4671-5p	0	0	0	0	#DIV/0!
hsa-miR-4672	0	1	0	7.9526	#DIV/0!
hsa-miR-4673	0	1	0	7.9526	#DIV/0!
hsa-miR-4676-5p	0	6	0	47.7156	#DIV/0!
hsa-miR-4678	0	0	0	0	#DIV/0!
hsa-miR-4679	0	2	0	15.9052	#DIV/0!
hsa-miR-4679	0	1	0	7.9526	#DIV/0!
hsa-miR-4680-5p	0	1	0	7.9526	#DIV/0!
hsa-miR-4680-3p	0	1	0	7.9526	#DIV/0!
hsa-miR-4682	0	0	0	0	#DIV/0!
hsa-miR-4684-5p	0	0	0	0	#DIV/0!
hsa-miR-4685-5p	0	1	0	7.9526	#DIV/0!
hsa-miR-4685-3p	0	0	0	0	#DIV/0!
hsa-miR-4691-5p	0	0	0	0	#DIV/0!
hsa-miR-4692	0	2	0	15.9052	#DIV/0!
hsa-miR-4693-5p	0	0	0	0	#DIV/0!
hsa-miR-4694-5p	0	0	0	0	#DIV/0!
hsa-miR-4694-3p	0	1	0	7.9526	#DIV/0!
hsa-miR-4696	0	0	0	0	#DIV/0!
hsa-miR-4697-5p	0	0	0	0	#DIV/0!
hsa-miR-4699-3p	0	0	0	0	#DIV/0!
hsa-miR-4700-3p	0	1	0	7.9526	#DIV/0!
hsa-miR-4701-5p	0	0	0	0	#DIV/0!
hsa-miR-4703-5p	0	0	0	0	#DIV/0!
hsa-miR-4703-3p	0	2	0	15.9052	#DIV/0!
hsa-miR-4704-5p	0	0	0	0	#DIV/0!
hsa-miR-4704-3p	0	0	0	0	#DIV/0!
hsa-miR-4707-3p	0	0	0	0	#DIV/0!
hsa-miR-4708-5p	0	0	0	0	#DIV/0!
hsa-miR-4708-3p	0	3	0	23.8578	#DIV/0!
hsa-miR-4709-5p	0	0	0	0	#DIV/0!
hsa-miR-4711-5p	0	0	0	0	#DIV/0!
hsa-miR-4711-3p	0	1	0	7.9526	#DIV/0!
hsa-miR-4712-5p	0	1	0	7.9526	#DIV/0!
hsa-miR-4713-5p	0	0	0	0	#DIV/0!
hsa-miR-4715-3p	0	3	0	23.8578	#DIV/0!
hsa-miR-4717-5p	0	0	0	0	#DIV/0!
hsa-miR-4718	0	9	0	71.5734	#DIV/0!
hsa-miR-4719	0	0	0	0	#DIV/0!
hsa-miR-4720-5p	0	0	0	0	#DIV/0!
hsa-miR-4720-3p	0	0	0	0	#DIV/0!
hsa-miR-4722-3p	0	1	0	7.9526	#DIV/0!
hsa-miR-4723-5p	0	2	0	15.9052	#DIV/0!
hsa-miR-4723-3p	0	0	0	0	#DIV/0!
hsa-miR-4724-5p	0	4	0	31.8104	#DIV/0!
hsa-miR-4724-3p	0	1	0	7.9526	#DIV/0!
hsa-miR-4725-5p	0	0	0	0	#DIV/0!
hsa-miR-4725-3p	0	2	0	15.9052	#DIV/0!
hsa-miR-4726-3p	0	0	0	0	#DIV/0!
hsa-miR-4727-5p	0	0	0	0	#DIV/0!
hsa-miR-4727-3p	0	2	0	15.9052	#DIV/0!
hsa-miR-4728-3p	0	1	0	7.9526	#DIV/0!
hsa-miR-4729	0	3	0	23.8578	#DIV/0!
hsa-miR-4731-5p	0	0	0	0	#DIV/0!
hsa-miR-4731-3p	0	1	0	7.9526	#DIV/0!
hsa-miR-4732-5p	0	3	0	23.8578	#DIV/0!
hsa-miR-4732-3p	0	1	0	7.9526	#DIV/0!
hsa-miR-4733-3p	0	0	0	0	#DIV/0!
hsa-miR-4734	0	3	0	23.8578	#DIV/0!
hsa-miR-4735-5p	0	0	0	0	#DIV/0!
hsa-miR-4735-3p	0	2	0	15.9052	#DIV/0!
hsa-miR-4736	0	1	0	7.9526	#DIV/0!
hsa-miR-4737	0	1	0	7.9526	#DIV/0!
hsa-miR-4738-5p	0	0	0	0	#DIV/0!
hsa-miR-4740-5p	0	0	0	0	#DIV/0!
hsa-miR-4743-5p	0	2	0	15.9052	#DIV/0!
hsa-miR-4743-3p	0	0	0	0	#DIV/0!
hsa-miR-4744	0	1	0	7.9526	#DIV/0!
hsa-miR-4745-3p	0	0	0	0	#DIV/0!
hsa-miR-4746-3p	0	1	0	7.9526	#DIV/0!
hsa-miR-4747-5p	0	0	0	0	#DIV/0!
hsa-miR-4747-3p	0	1	0	7.9526	#DIV/0!
hsa-miR-4748	0	5	0	39.763	#DIV/0!
hsa-miR-4749-5p	0	3	0	23.8578	#DIV/0!
hsa-miR-4749-3p	0	0	0	0	#DIV/0!
hsa-miR-4750-3p	0	0	0	0	#DIV/0!
hsa-miR-4751	0	0	0	0	#DIV/0!
hsa-miR-4754	0	5	0	39.763	#DIV/0!
hsa-miR-4755-5p	0	1	0	7.9526	#DIV/0!
hsa-miR-4756-5p	0	0	0	0	#DIV/0!
hsa-miR-4756-3p	0	0	0	0	#DIV/0!
hsa-miR-4757-5p	0	1	0	7.9526	#DIV/0!
hsa-miR-4757-3p	0	1	0	7.9526	#DIV/0!
hsa-miR-4758-5p	0	4	0	31.8104	#DIV/0!
hsa-miR-4758-3p	0	0	0	0	#DIV/0!
hsa-miR-4759	0	2	0	15.9052	#DIV/0!
hsa-miR-4760-3p	0	0	0	0	#DIV/0!
hsa-miR-4761-5p	0	0	0	0	#DIV/0!
hsa-miR-4762-5p	0	0	0	0	#DIV/0!
hsa-miR-4763-5p	0	0	0	0	#DIV/0!
hsa-miR-4764-5p	0	3	0	23.8578	#DIV/0!
hsa-miR-4764-3p	0	0	0	0	#DIV/0!
hsa-miR-4765	0	1	0	7.9526	#DIV/0!
hsa-miR-4767	0	0	0	0	#DIV/0!
hsa-miR-4768-5p	0	0	0	0	#DIV/0!
hsa-miR-4768-3p	0	1	0	7.9526	#DIV/0!
hsa-miR-4769-5p	0	3	0	23.8578	#DIV/0!
hsa-miR-4772-5p	0	0	0	0	#DIV/0!
hsa-miR-4774-5p	0	0	0	0	#DIV/0!
hsa-miR-4774-3p	0	0	0	0	#DIV/0!
hsa-miR-4776-5p	0	2	0	15.9052	#DIV/0!
hsa-miR-4776-3p	0	0	0	0	#DIV/0!
hsa-miR-4776-5p	0	2	0	15.9052	#DIV/0!
hsa-miR-4776-3p	0	0	0	0	#DIV/0!
hsa-miR-4777-5p	0	1	0	7.9526	#DIV/0!
hsa-miR-4777-3p	0	1	0	7.9526	#DIV/0!
hsa-miR-4779	0	1	0	7.9526	#DIV/0!
hsa-miR-4780	0	0	0	0	#DIV/0!
hsa-miR-4782-3p	0	1	0	7.9526	#DIV/0!
hsa-miR-4783-5p	0	1	0	7.9526	#DIV/0!
hsa-miR-4788	0	0	0	0	#DIV/0!
hsa-miR-4790-5p	0	0	0	0	#DIV/0!
hsa-miR-4790-3p	0	0	0	0	#DIV/0!
hsa-miR-4793-5p	0	2	0	15.9052	#DIV/0!
hsa-miR-4795-5p	0	0	0	0	#DIV/0!
hsa-miR-4795-3p	0	1	0	7.9526	#DIV/0!
hsa-miR-4796-5p	0	2	0	15.9052	#DIV/0!
hsa-miR-4797-5p	0	0	0	0	#DIV/0!
hsa-miR-4798-5p	0	9	0	71.5734	#DIV/0!
hsa-miR-4798-3p	0	0	0	0	#DIV/0!
hsa-miR-4799-5p	0	0	0	0	#DIV/0!
hsa-miR-4799-3p	0	0	0	0	#DIV/0!
hsa-miR-4801	0	0	0	0	#DIV/0!
hsa-miR-4802-5p	0	0	0	0	#DIV/0!
hsa-miR-487a-5p	0	0	0	0	#DIV/0!
hsa-miR-487b-5p	0	0	0	0	#DIV/0!
hsa-miR-489-5p	0	0	0	0	#DIV/0!
hsa-miR-494-5p	0	0	0	0	#DIV/0!
hsa-miR-495-5p	0	0	0	0	#DIV/0!
hsa-miR-496	0	1	0	7.9526	#DIV/0!
hsa-miR-497-3p	0	1	0	7.9526	#DIV/0!
hsa-miR-4999-5p	0	6	0	47.7156	#DIV/0!
hsa-miR-4999-3p	0	0	0	0	#DIV/0!
hsa-miR-499b-3p	0	0	0	0	#DIV/0!
hsa-miR-5000-5p	0	1	0	7.9526	#DIV/0!
hsa-miR-5002-3p	0	1	0	7.9526	#DIV/0!
hsa-miR-5003-5p	0	0	0	0	#DIV/0!
hsa-miR-5003-3p	0	0	0	0	#DIV/0!
hsa-miR-5004-5p	0	0	0	0	#DIV/0!
hsa-miR-5006-5p	0	8	0	63.6208	#DIV/0!
hsa-miR-5007-5p	0	1	0	7.9526	#DIV/0!
hsa-miR-5007-3p	0	0	0	0	#DIV/0!
hsa-miR-5009-3p	0	1	0	7.9526	#DIV/0!
hsa-miR-5011-5p	0	0	0	0	#DIV/0!
hsa-miR-5011-3p	0	1	0	7.9526	#DIV/0!
hsa-miR-504-3p	0	2	0	15.9052	#DIV/0!
hsa-miR-5047	0	1	0	7.9526	#DIV/0!
hsa-miR-506-5p	0	1	0	7.9526	#DIV/0!
hsa-miR-508-5p	0	0	0	0	#DIV/0!
hsa-miR-508-3p	0	0	0	0	#DIV/0!
hsa-miR-5087	0	0	0	0	#DIV/0!
hsa-miR-509-5p	0	0	0	0	#DIV/0!
hsa-miR-509-5p	0	0	0	0	#DIV/0!
hsa-miR-509-3-5p	0	0	0	0	#DIV/0!
hsa-miR-5091	0	1	0	7.9526	#DIV/0!
hsa-miR-5092	0	1	0	7.9526	#DIV/0!
hsa-miR-510-3p	0	3	0	23.8578	#DIV/0!
hsa-miR-511-3p	0	4	0	31.8104	#DIV/0!
hsa-miR-512-5p	0	1	0	7.9526	#DIV/0!
hsa-miR-512-5p	0	1	0	7.9526	#DIV/0!
hsa-miR-513a-5p	0	1	0	7.9526	#DIV/0!
hsa-miR-513a-3p	0	3	0	23.8578	#DIV/0!
hsa-miR-513a-5p	0	1	0	7.9526	#DIV/0!
hsa-miR-513a-3p	0	3	0	23.8578	#DIV/0!
hsa-miR-513b-5p	0	5	0	39.763	#DIV/0!
hsa-miR-513b-3p	0	1	0	7.9526	#DIV/0!
hsa-miR-513c-3p	0	0	0	0	#DIV/0!
hsa-miR-514b-5p	0	1	0	7.9526	#DIV/0!
hsa-miR-514b-3p	0	3	0	23.8578	#DIV/0!
hsa-miR-515-5p	0	0	0	0	#DIV/0!
hsa-miR-515-3p	0	0	0	0	#DIV/0!
hsa-miR-515-5p	0	0	0	0	#DIV/0!
hsa-miR-515-3p	0	0	0	0	#DIV/0!
hsa-miR-516a-5p	0	2	0	15.9052	#DIV/0!
hsa-miR-516a-3p	0	0	0	0	#DIV/0!
hsa-miR-516a-5p	0	2	0	15.9052	#DIV/0!
hsa-miR-516a-3p	0	0	0	0	#DIV/0!
hsa-miR-516b-3p	0	0	0	0	#DIV/0!
hsa-miR-516b-3p	0	0	0	0	#DIV/0!
hsa-miR-517c-3p	0	0	0	0	#DIV/0!
hsa-miR-5186	0	3	0	23.8578	#DIV/0!
hsa-miR-5187-3p	0	0	0	0	#DIV/0!
hsa-miR-5188	0	1	0	7.9526	#DIV/0!
hsa-miR-5189-5p	0	1	0	7.9526	#DIV/0!
hsa-miR-5189-3p	0	1	0	7.9526	#DIV/0!
hsa-miR-518a-3p	0	0	0	0	#DIV/0!
hsa-miR-518a-5p	0	2	0	15.9052	#DIV/0!
hsa-miR-518a-3p	0	0	0	0	#DIV/0!
hsa-miR-518c-5p	0	0	0	0	#DIV/0!
hsa-miR-518c-3p	0	0	0	0	#DIV/0!
hsa-miR-518d-5p	0	1	0	7.9526	#DIV/0!
hsa-miR-518d-3p	0	0	0	0	#DIV/0!
hsa-miR-518e-5p	0	7	0	55.6682	#DIV/0!
hsa-miR-518e-3p	0	0	0	0	#DIV/0!
hsa-miR-518f-5p	0	1	0	7.9526	#DIV/0!
hsa-miR-518f-3p	0	1	0	7.9526	#DIV/0!
hsa-miR-5190	0	1	0	7.9526	#DIV/0!
hsa-miR-5191	0	2	0	15.9052	#DIV/0!
hsa-miR-5192	0	0	0	0	#DIV/0!
hsa-miR-5193	0	0	0	0	#DIV/0!
hsa-miR-5195-5p	0	2	0	15.9052	#DIV/0!
hsa-miR-5196-5p	0	8	0	63.6208	#DIV/0!
hsa-miR-5197-5p	0	0	0	0	#DIV/0!
hsa-miR-519a-5p	0	6	0	47.7156	#DIV/0!
hsa-miR-519b-5p	0	7	0	55.6682	#DIV/0!
hsa-miR-519b-3p	0	0	0	0	#DIV/0!
hsa-miR-519c-5p	0	7	0	55.6682	#DIV/0!
hsa-miR-519c-3p	0	2	0	15.9052	#DIV/0!
hsa-miR-519d-5p	0	42	0	334.009	#DIV/0!
hsa-miR-519e-5p	0	0	0	0	#DIV/0!
hsa-miR-519e-3p	0	0	0	0	#DIV/0!
hsa-miR-520a-5p	0	0	0	0	#DIV/0!
hsa-miR-520b	0	0	0	0	#DIV/0!
hsa-miR-520c-5p	0	1	0	7.9526	#DIV/0!
hsa-miR-520c-3p	0	0	0	0	#DIV/0!
hsa-miR-520e	0	0	0	0	#DIV/0!
hsa-miR-520f-5p	0	47	0	373.772	#DIV/0!
hsa-miR-520f-3p	0	0	0	0	#DIV/0!
hsa-miR-520g-5p	0	0	0	0	#DIV/0!
hsa-miR-521	0	0	0	0	#DIV/0!
hsa-miR-521	0	0	0	0	#DIV/0!
hsa-miR-522-5p	0	7	0	55.6682	#DIV/0!
hsa-miR-523-5p	0	7	0	55.6682	#DIV/0!
hsa-miR-523-3p	0	0	0	0	#DIV/0!
hsa-miR-525-5p	0	0	0	0	#DIV/0!
hsa-miR-526a	0	1	0	7.9526	#DIV/0!
hsa-miR-526a	0	1	0	7.9526	#DIV/0!
hsa-miR-526b-3p	0	0	0	0	#DIV/0!
hsa-miR-539-5p	0	0	0	0	#DIV/0!
hsa-miR-541-5p	0	2	0	15.9052	#DIV/0!
hsa-miR-544a	0	0	0	0	#DIV/0!
hsa-miR-544b	0	0	0	0	#DIV/0!
hsa-miR-548ac	0	0	0	0	#DIV/0!
hsa-miR-548ad	0	0	0	0	#DIV/0!
hsa-miR-548ae	0	0	0	0	#DIV/0!
hsa-miR-548ae	0	0	0	0	#DIV/0!
hsa-miR-548ah-5p	0	0	0	0	#DIV/0!
hsa-miR-548ai	0	0	0	0	#DIV/0!
hsa-miR-548al	0	0	0	0	#DIV/0!
hsa-miR-548ao-5p	0	0	0	0	#DIV/0!
hsa-miR-548ap-5p	0	0	0	0	#DIV/0!
hsa-miR-548ap-3p	0	0	0	0	#DIV/0!
hsa-miR-548as-3p	0	0	0	0	#DIV/0!
hsa-miR-548at-3p	0	0	0	0	#DIV/0!
hsa-miR-548au-3p	0	5	0	39.763	#DIV/0!
hsa-miR-548av-3p	0	4	0	31.8104	#DIV/0!
hsa-miR-548aw	0	0	0	0	#DIV/0!
hsa-miR-548ax	0	0	0	0	#DIV/0!
hsa-miR-548az-3p	0	0	0	0	#DIV/0!
hsa-miR-548ba	0	0	0	0	#DIV/0!
hsa-miR-548f-5p	0	1	0	7.9526	#DIV/0!
hsa-miR-548f-3p	0	0	0	0	#DIV/0!
hsa-miR-548f-3p	0	1	0	7.9526	#DIV/0!
hsa-miR-548g-3p	0	1	0	7.9526	#DIV/0!
hsa-miR-548i	0	1	0	7.9526	#DIV/0!
hsa-miR-548i	0	1	0	7.9526	#DIV/0!
hsa-miR-548i	0	1	0	7.9526	#DIV/0!
[truncated: 793 more rows]
