# Supplementary material for: Y-box protein 1 is required to sort microRNAs into exosomes in cells and in a cell-free reaction
Source: eLife journal article supplement (doi:10.7554/elife.19276), 2016-08-25
Supplement: supp [file elife_poa_e19276_Figure_2_figure_supplement_1.pdf › elife_poa_e19276_Figure_2_figure_supplement_1.pdf]

**a**

**miR-223 Precursor**

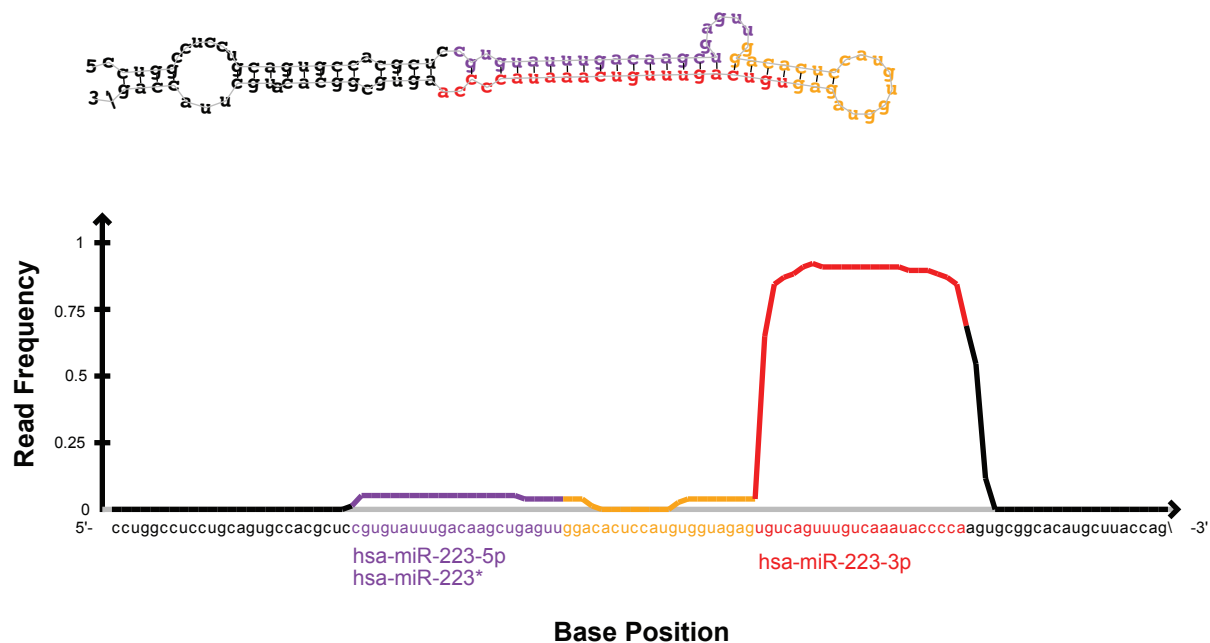

**b**

**miR-144 Precursor**

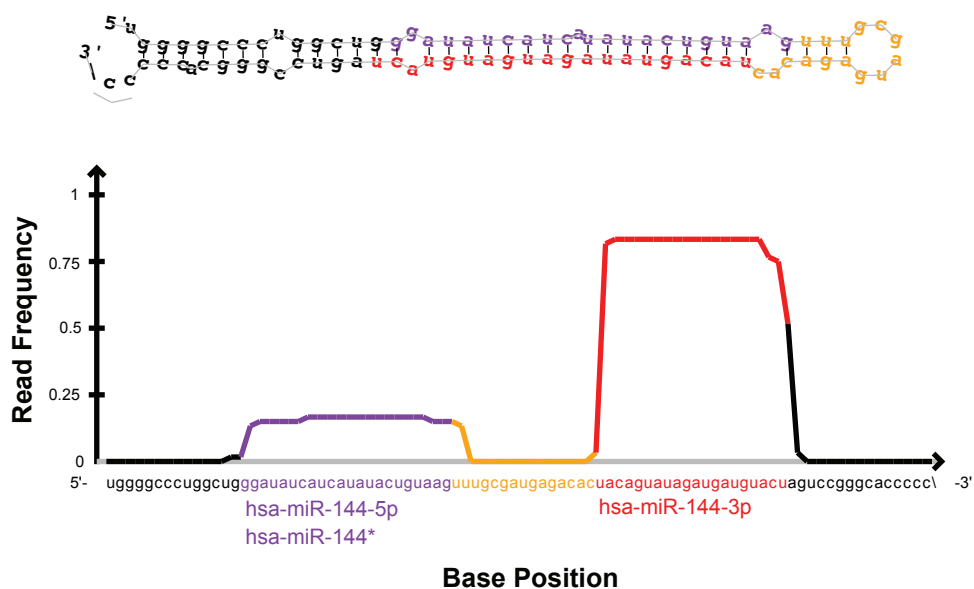

**Figure 2 - Supplement 1: Read frequency distribution along miR-223 and miR-144 precursors**
