# Supplementary figures and images for: Y-box protein 1 is required to sort microRNAs into exosomes in cells and in a cell-free reaction
Source: eLife journal article supplement (doi:10.7554/elife.19276), 2016-08-25

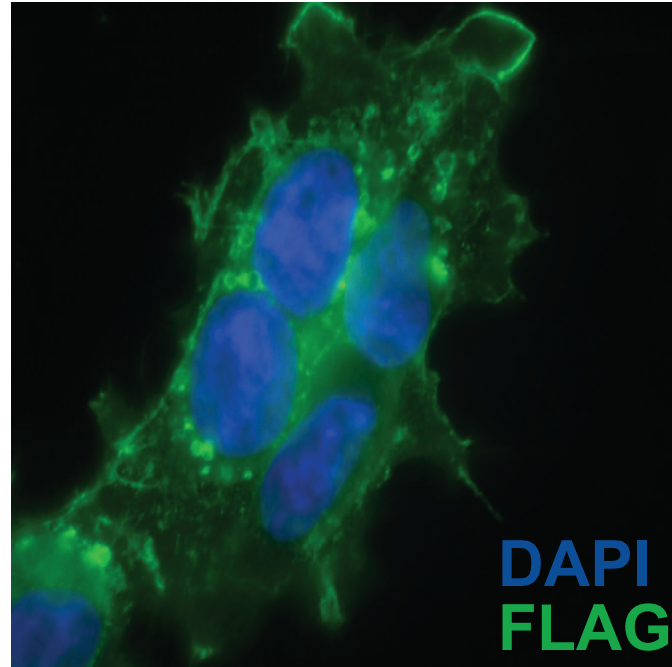

**Figure 1 - supplement: Sub-cellular localization of C-terminal CD63-luciferase-FLAG fusion**

Supplement: supp [file elife_poa_e19276_Figure_1_figure_supplement_1.pdf › elife_poa_e19276_Figure_1_figure_supplement_1.pdf]

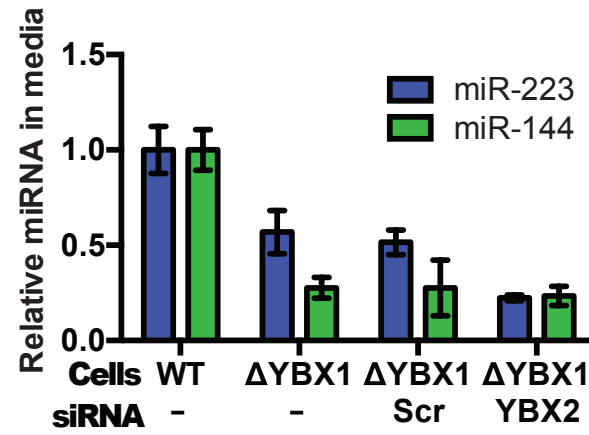

**Figure 7 - supplement 1: Partial redundancy for YBX2 for the secretion of miR-223 in cells**

Supplement: supp [file elife_poa_e19276_Figure_7_figure_supplement_1.pdf › elife_poa_e19276_Figure_7_figure_supplement_1.pdf]

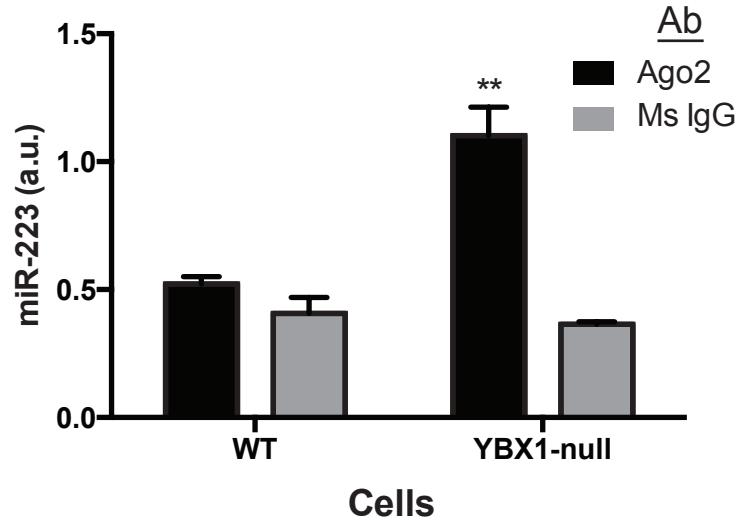

**Figure 7 - supplement 2: miR-223 association with Ago2 in WT and  $\Delta$ YBX1 cells**

Supplement: supp [file elife_poa_e19276_Figure_7_figure_supplement_2.pdf › elife_poa_e19276_Figure_7_figure_supplement_2.pdf]
